# A scalable serology solution for profiling humoral immune responses to SARS-CoV-2 infection and vaccination

**Running Title:** A scalable COVID-19 serology solution

Karen Colwill<sup>1</sup>, Yannick Galipeau<sup>2</sup>, Matthew Stuible<sup>3</sup>, Christian Gervais<sup>3</sup>, Corey Arnold<sup>2</sup>, Bhavisha Rathod<sup>1,4</sup>, Kento T Abe<sup>1,5</sup>, Jenny H Wang<sup>1</sup>, Adrian Pasculescu<sup>1</sup>, Mariam Maltseva<sup>2</sup>, Lynda Rocheleau<sup>2</sup>, Martin Pelchat<sup>2,6</sup>, Mahya Fazel-Zarandi<sup>1</sup>, Mariam Iskilova<sup>1</sup>, Miriam Barrios-Rodiles<sup>1</sup>, Linda Bennett<sup>1</sup>, Kevin Yau<sup>7</sup>, François Cholette<sup>8,9</sup>, Christine Mesa<sup>8</sup>, Angel X Li<sup>1,10</sup>, Aimee Paterson<sup>1,10</sup>, Michelle A Hladunewich<sup>7</sup>, Pamela J Goodwin<sup>1,11</sup>, Jeffrey L Wrana<sup>1,5</sup>, Steven J Drews<sup>12</sup>, Samira Mubareka<sup>13</sup>, Allison J McGeer<sup>1,10,14</sup>, John Kim<sup>8</sup>, Marc-André Langlois<sup>2,6\*</sup>, Anne-Claude Gingras<sup>1,5\*</sup>, Yves Durocher<sup>3\*</sup>

<sup>1</sup> Lunenfeld-Tanenbaum Research Institute at Mount Sinai Hospital, Sinai Health, Toronto, ON, Canada

<sup>2</sup> Department of Biochemistry, Microbiology, and Immunology, University of Ottawa, Ottawa, ON, Canada

<sup>3</sup> Mammalian Cell Expression, Human Health Therapeutics Research Centre, National Research Council Canada, Montréal, QC, Canada

<sup>4</sup> Current Address: Treadwell Therapeutics, Toronto, ON, Canada

<sup>5</sup> Department of Molecular Genetics, University of Toronto, Toronto, ON, Canada

<sup>6</sup> The Centre for Infection, Immunity, and Inflammation, University of Ottawa, Ottawa, ON, Canada

<sup>7</sup> Division of Nephrology, Department of Medicine, Sunnybrook Health Sciences Centre, Toronto, ON, Canada

<sup>8</sup> National Microbiology Laboratory, Public Health Agency of Canada, Winnipeg, MB, Canada

<sup>9</sup> Department of Medical Microbiology and Infectious Diseases, University of Manitoba, Winnipeg, MB

<sup>10</sup> Department of Microbiology, at Mount Sinai Hospital, Sinai Health, Toronto, ON, Canada

<sup>11</sup> Department of Medicine, University of Toronto, Toronto, ON, Canada

<sup>12</sup> Canadian Blood Services, Microbiology, Donation Policy and Studies, Edmonton, and Department of Laboratory Medicine and Pathology, Division of Diagnostic and Applied Microbiology, University of Alberta, Edmonton, AB, Canada

<sup>13</sup> Department of Laboratory Medicine and Molecular Diagnostics, Division of Microbiology, Sunnybrook Health Sciences Centre; Biological Sciences, Sunnybrook Research Institute; Division of Infectious Diseases, Sunnybrook Health Sciences Centre; and Department of Laboratory Medicine and Pathology, University of Toronto, Toronto, ON, Canada

<sup>14</sup> Institute of Health Policy, Management and Evaluation, University of Toronto, Toronto, ON, Canada

**\*Correspondence:**

Marc-André Langlois: [langlois@uottawa.ca](mailto:langlois@uottawa.ca)

Anne-Claude Gingras: [gingras@lunenfeld.ca](mailto:gingras@lunenfeld.ca)

Yves Durocher: [yves.durocher@cnrc-nrc.gc.ca](mailto:yves.durocher@cnrc-nrc.gc.ca)

Lead contact: Anne-Claude Gingras: [gingras@lunenfeld.ca](mailto:gingras@lunenfeld.ca)

42 **Abstract**

43

44 **OBJECTIVES:** Antibody testing against severe acute respiratory syndrome coronavirus 2 (SARS-CoV-2)  
45 has been instrumental in detecting previous exposures and analyzing vaccine-elicited immune  
46 responses. Here, we describe a scalable solution to detect and quantify SARS-CoV-2 antibodies,  
47 discriminate between natural infection- and vaccination-induced responses, and assess antibody-  
48 mediated inhibition of the spike-angiotensin converting enzyme 2 (ACE2) interaction.

49

50 **METHODS:** We developed methods and reagents to detect SARS-CoV-2 antibodies by enzyme-linked  
51 immunosorbent assay (ELISA). The main assays focus on the parallel detection of immunoglobulin  
52 (Ig)Gs against the spike trimer, its receptor binding domain (RBD), and nucleocapsid (N). We  
53 automated a surrogate neutralization (sn)ELISA that measures inhibition of ACE2-spike or -RBD  
54 interactions by antibodies. The assays were calibrated to a World Health Organization reference  
55 standard.

56

57 **RESULTS:** Our single-point IgG-based ELISAs accurately distinguished non-infected and infected  
58 individuals. For seroprevalence assessment (in a non-vaccinated cohort), classifying a sample as  
59 positive if antibodies were detected for  $\geq 2$  of the 3 antigens provided the highest specificity. In  
60 vaccinated cohorts, increases in anti-spike and -RBD (but not -N) antibodies are observed. We present  
61 detailed protocols for serum/plasma or dried blood spots analysis performed manually and on  
62 automated platforms. The snELISA can be performed automatically at single points, increasing its  
63 scalability.

64

65 **CONCLUSIONS:** Measuring antibodies to three viral antigens and identify neutralizing antibodies  
66 capable of disrupting spike-ACE2 interactions in high-throughput enables large-scale analyses of  
67 humoral immune responses to SARS-CoV-2 infection and vaccination. The reagents are available to  
68 enable scaling up of standardized serological assays, permitting inter-laboratory data comparison and  
69 aggregation.

70

71 **Keywords:** SARS-CoV-2, antibody detection, antibody neutralization, assay development and  
72 standardization, high-throughput screening

73

## 74 INTRODUCTION

75

76 The severe acute respiratory syndrome coronavirus 2 (SARS-CoV-2) pandemic has already induced  
77 four major waves of infection in Canada, resulting in > 3.2M confirmed infections and > 36K deaths (as  
78 of February 25<sup>th</sup>, 2022 <sup>1</sup>). Overall seroprevalence estimates from natural infection during the pre-  
79 Omicron waves were relatively low compared to other countries <sup>2, 3</sup>, and protecting the population  
80 from coronavirus disease of 2019 (COVID-19) has therefore heavily relied on vaccination. Fortunately,  
81 the dramatic acceleration of vaccination in Canada over the past 8 months has decreased  
82 symptomatic infections, severe disease, and deaths <sup>4</sup>; as of February 18<sup>th</sup>, 2022, 84% of the  
83 population 5 years and older were fully vaccinated <sup>5</sup>.

84

85 However, several important questions remain regarding both infection- and vaccination-induced  
86 humoral immunity, including the duration and decay of the immune response, the generation of  
87 functional neutralizing antibodies, and the overall differences in humoral responses across groups of  
88 individuals with different co-morbidities or following vaccination with different brands and regimens.  
89 This information can help guide and prioritize public health programs, such as vaccine booster  
90 schedules <sup>6</sup>.

91

92 Plate-based enzyme-linked immunosorbent assays (ELISAs) are widely used scalable methods to  
93 quantitatively assess antibody responses to pathogens, including SARS-CoV-2. Microwells are coated  
94 with recombinant SARS-CoV-2 protein antigens, and biofluid samples (e.g. serum, plasma, dried blood  
95 spot (DBS) eluate, or saliva) are added (Figure 1a). If antibodies that recognize the antigen are  
96 present, they are detected with a secondary antibody, typically linked to an enzyme (such as  
97 horseradish peroxidase (HRP)) that elicits a measurable change upon addition of a colorimetric or  
98 chemiluminescent substrate.

99

100 Because of their potent immunogenicity, antigens derived from the SARS-CoV-2 spike and  
101 nucleocapsid (N) proteins have been most frequently used in serological assays, including those  
102 developed by commercial vendors. Full proteins, protein segments, and even peptides have been  
103 used in these assays which, combined with their different formats and readouts, yield distinct  
104 sensitivity and specificity profiles. This can lead to confusion in interpreting results. For example,  
105 conclusions about the persistence of antibodies to the nucleocapsid (N) protein differ depending on  
106 the platform used, and commercial vendors often do not disclose the exact amino acid sequence of  
107 their antigens <sup>7</sup>.

108

109 We have previously used ELISAs to show that immunoglobulin (Ig)G (but not IgM or IgA) against SARS-  
110 CoV-2 spike, RBD, and N can persist for at least 3–4 months in the serum and saliva of individuals with  
111 COVID-19 <sup>8</sup>, an observation now corroborated and extended by several other studies describing the  
112 persistence of circulating IgGs up to 13 months (although with gradual declines; e.g. <sup>9-12</sup>). We also  
113 showed that the production of neutralizing antibodies capable of preventing interactions between  
114 spike (or its RBD) and its target angiotensin converting enzyme 2 (ACE2) could be monitored using a  
115 plate-based surrogate neutralization (sn)ELISA <sup>13</sup>. We demonstrated good correlations between this  
116 assay and both spike-pseudotyped lentiviral and authentic SARS-CoV-2 plaque neutralization assays,  
117 suggesting that this could provide a scalable and suitable alternative to costly and labor-intensive  
118 classical antibody neutralization assessment.

119

120 While laboratory-based ELISAs like ours have been developed around the world, the various sources  
121 of antigens and antibodies used by different groups (in addition to batch-to-batch variation within  
122 groups) impede national and international comparisons of seroprevalence and vaccine effectiveness.  
123 This is further challenged by the lack of agreed-upon reference standards, with the exception of pools  
124 of convalescent plasma distributed through the World Health Organization (WHO) to calibrate assays  
125 to standardized units<sup>14</sup>. Furthermore, assay performance variability over time remains incompletely  
126 examined. To address this, we have developed a reproducible and scalable SARS-CoV-2 serology  
127 solution using standardized protein reagents and protocols (Figure 1) and independent automated  
128 platforms in 2 Canadian laboratories in Toronto and Ottawa. This system has now been used to profile  
129 > 150K unique samples, demonstrating its scalability and robustness. Importantly, these reagents and  
130 protocols are available to the research community to enable implementation of these assays across  
131 laboratories.

132  
133

## 134 Results

135

### 136 Reagent production

137 To facilitate comparison of SARS-CoV-2 serology results across Canada, we sought to develop and  
138 validate a scalable ELISA-based assay that leverages the mammalian protein expression expertise of  
139 the National Research Council of Canada (NRC) Human Health Therapeutics Research Centre. We  
140 optimized the production and purification of SARS-CoV-2 proteins (spike trimer, spike RBD, and N  
141 from the original Wuhan-Hu-1 strain) to generate large-scale high-purity batches of antigens (Figure  
142 1b, Supplementary figures 1 and 2, Supplementary table 1). These were fused with purification tags  
143 ((His)<sub>6</sub> and FLAG, with or without a Twin Strep-tag) and expressed in Chinese Hamster Ovary (CHO)  
144 cells either as stably transfected pools (spike) or through transient transfection (RBD, N)<sup>8, 15</sup>. Antigens  
145 were purified by Immobilized Metal Affinity Chromatography (IMAC), with one or two additional  
146 purification steps performed for RBD and N (StrepTrap XT columns and/or preparative size exclusion  
147 chromatography, SEC). The spike and RBD proteins were highly pure when analyzed by SDS-PAGE  
148 (Figure 1b). By analytical SEC, spike eluted as a major (>95% integrated area) symmetrical peak of 490  
149 kDa (consistent with its trimeric structure) with < 3% hexamers/aggregates, and both versions of RBD  
150 (encoding amino acids 319–541 and 331–521, respectively) eluted as single peaks with >95%  
151 integrated area. For purified N, some truncated forms were visible by SDS-PAGE/Coomassie staining;  
152 however, by SEC, it eluted as a major (>99% integrated area) peak with no apparent larger aggregates.  
153 Estimation of molecular weight of N was not possible by multiangle light scattering (MALS), but based  
154 on the SEC elution volume, it appears to be ~300 kDa. This is consistent with the formation of  
155 tetramers or hexamers by recombinant coronavirus N, as reported by others<sup>16</sup>. For recombinant  
156 protein production in CHO cells, post-purification yields ranged from 25 mg L<sup>-1</sup> for RBD 331–521 to  
157 370 mg L<sup>-1</sup> for spike (Supplementary table 1).

158

159 The antigen toolbox was supplemented with a detection reagent, namely an anti-human IgG  
160 monoclonal antibody (IgG#5) expressed as a HRP fusion in-frame to the heavy chain (HC) C-terminus.  
161 This reagent was developed to address an issue common to HRP-based detection reagents from  
162 commercial sources, which are usually polyclonal anti-IgG antibodies conjugated to HRP post-  
163 purification. These commercial reagents display variability due to the nature of the polyclonal serum  
164 used by each supplier, as well as the ratio of conjugated HRP molecules per antibody. IgG#5 was  
165 produced by co-transfecting HC and light chain (LC) expression vectors in CHO cells. As shown in

166 Figure 1, the purified antibody consists of a predominant band at ~110 kDa, which represents the full-  
167 length HC-HRP fusion peptide. A minor band at ~55 kDa is likely a form of the HC lacking HRP  
168 (confirmed by western blotting with an anti-mouse-Fc antibody (data not shown)), while the LC  
169 presents as a smear between 25 and 37 kDa. Because of this heterogeneity, purified IgG#5-HRP gave a  
170 convoluted profile by analytical SEC (Supplementary figure 1).

171

172 To have a common reference that enables intra- and inter-lab comparisons of SARS-CoV-2 antibody  
173 responses, we also generated recombinant anti-spike antibodies. Compared to pools of serum or  
174 plasma from convalescent patients, these offer the advantage of being renewable, scalable, and  
175 defined in sequence. Three recombinant single-domain antibodies (VHHs) were selected: VHH72 is a  
176 SARS-CoV and SARS-CoV-2 cross-reactive antibody described in Wrapp *et al.*<sup>17</sup>, and NRCov2-04 and -  
177 20 are SARS-CoV-2 spike-binding VHHs developed in-house at the NRC. All antibodies were produced  
178 in CHO cells and purified on a MabSelect SuRe column. VHH sequences were fused at the C-terminus  
179 to Fc1X7 (an antibody-dependent cellular cytotoxicity (ADCC)-attenuated variant of human Fc) to  
180 produce dimeric proteins upon secretion from CHO cells. VHH72-Fc eluted as a single symmetrical  
181 peak of 102 kDa with < 2% aggregates, NRCov2-04-Fc eluted with a major peak of 67% integrated  
182 area and a peak of 90 kDa, and NRCov2-20-Fc as a single peak of 100 kDa with < 2% aggregates  
183 (Supplementary figures 1 and 2; Supplementary Table 1). The toolbox was further supplemented with  
184 a biotinylated ACE2 protein (used for snELISA), which was purified on both IMAC and Strep-Tactin XT  
185 Superflow columns and elutes from SEC as a single peak of 90 kDa (Supplementary figure 1).

186

187 While the goal is ultimately to have a fully NRC-sourced protein toolbox, the current set of reagents is  
188 complemented by a commercial anti-N antibody to quantify the anti-N response (see Methods). As  
189 described below, the assays can also be repurposed for IgA/M monitoring with commercial secondary  
190 antibodies and matching reference antibodies for calibration.

191

## 192 **Direct detection ELISA**

193 We previously developed ELISAs in 96-well colorimetric or 384-well chemiluminescent formats to  
194 assess the persistence of antibody responses<sup>8</sup>. This first version relied on small-batch research-grade  
195 or commercial reagents that are not readily scalable for nationwide surveillance studies. Here, we  
196 have first benchmarked the NRC reagents described above, and defined the optimal antigen and  
197 secondary antibody amounts in a 384-well automated format (see Methods). The NRC protein toolkit  
198 was independently optimized on automated platforms in Toronto (a Thermo Fisher Scientific F7  
199 platform) and Ottawa (a Hamilton system), leading to minor variations in the optimal amounts of  
200 antigens and detection reagents, in part due to differences in the detectors on each system  
201 (Supplementary table 2). While the platforms can be used to generate full titration curves from serum  
202 samples, single-point measurements more readily enable scaling up to thousands of samples and  
203 have been used in most large-scale studies to date.

204

205 Toronto platform: The optimal dilution for single-point ELISAs was established using a 10-point four-  
206 fold titration series starting with 0.25  $\mu$ L positive control serum per well (a 1:40 dilution, which is the  
207 amount used previously<sup>8</sup>; Supplementary figure 3). A prozone (hook) effect was noted at the 1:40  
208 dilution for samples with higher antibody levels, suggesting that a lower concentration was desirable.  
209 We performed receiver operating characteristic (ROC) analysis on a set of 300 negative pre-COVID19  
210 samples (collected prior to November 2019) and 211 PCR-confirmed convalescent patients (>14 d  
211 post-symptom onset) at three different concentrations (Supplementary figure 4), optimizing for an

212 amount of serum that would work with all three antigens. The 0.0625  $\mu$ L per well serum condition  
213 was selected for single-point ELISA based on a reduced hook effect on spike (compared to the highest  
214 amount) and better specificity and sensitivity characteristics on its RBD (compared to the lowest  
215 amount). A final ROC analysis combining data from a second replicate at 0.0625  $\mu$ L per well at a false  
216 positive rate of  $< 1\%$  revealed sensitivities of 94%, 92%, and 81% for spike trimer, RBD, and N  
217 respectively (Table 1, Supplementary figure 4b). Importantly, replicates from experiments conducted  
218 8 weeks apart were highly correlated ( $\rho > 0.87$  for all three antigens, Figure 2a), similar to our  
219 previous observations<sup>8</sup>, giving us confidence in conducting large-scale cohort studies.

220  
221 Ottawa platform: Early optimizations of the serological assay to identify the serum dilution within a  
222 linear range with the lowest non-specific reactivity to the negative serum were performed using the  
223 manual colorimetric ELISA (Supplementary figure 5). The colorimetric assay was used to test the  
224 performance of the HRP-conjugated antibodies, including six different anti-human IgG conjugate  
225 antibodies provided by the NRC (Supplementary figure 6a) with different characteristics and enzyme  
226 conjugation strategies (e.g. HRP fusion vs conjugation). While all candidates offered good detection,  
227 IgG#5—a direct HRP fusion—was selected for further assays, based on its superior quantitative  
228 capacity and extremely low non-specific reactivity within a standard reaction time (Supplementary  
229 figure 6b). This reagent was also compared to commercial polyclonal and monoclonal secondary  
230 antibodies for the detection of anti-spike, -RBD, and -N IgG in DBS samples (see below and  
231 Supplementary figure 7c). While all antibodies correctly identified negative and positive DBS samples,  
232 IgG-#5-HRP offered the greatest distinction between the negative and positive distributions. To  
233 maintain a high level of specificity, the secondary antibody concentration and the nature of substrate  
234 were modified between the manual and automated ELISAs (see Supplementary table 2 for the final  
235 concentrations).

### 236 237 **Setting positivity thresholds in seroprevalence studies**

238 One concern with establishing thresholds based on a single sample set is that over time and with  
239 variations in sample type (venipuncture vs. capillary blood collection, different collection tubes and  
240 handling conditions, etc.), the background of the assay may change, affecting the threshold for  
241 reporting positives. In Toronto, we monitored the negative controls (blanks, pre-COVID-19 negative  
242 sera, commercially purified IgG,  $n = 1,320$  for spike and 1,248 for N and RBD) used in 23 experiments  
243 conducted over 4 months. We calculated a threshold of 3 SDs from the mean of the log distribution of  
244 these controls and compared it to the thresholds established by ROC analysis (Figure 2b). The  
245 thresholds were very similar for N and spike, but the 3 SD range was more stringent for the RBD,  
246 decreasing the likelihood of false positive calls. We therefore adopted a threshold of 3 SDs from the  
247 mean of these controls for each antigen and recalculated our performance characteristics (Table 1).  
248 At this threshold, the specificity for RBD increases to 100% with a slight decrease in sensitivity to 89%,  
249 spike retained the same sensitivity and specificity (99% and 94%, respectively), whereas N's sensitivity  
250 decreased from 81% to 79% with 99% specificity. The same strategy was applied to IgM and IgA to  
251 define stringent thresholds (Supplementary figure 8, Supplementary table 4).

252  
253 Even with these conservative thresholds, an unacceptable number of false calls may be made in low  
254 seroprevalence situations (as in Canada, particularly during the first waves of infection). This is shown  
255 by the negative samples (red dots in Figure 2a) that passed the thresholds in individual assays.  
256 Importantly, these pre-COVID negatives were only ever positive in one test, in contrast to true  
257 positives, which tended to pass the positivity thresholds of  $\geq 2$  tests, consistent with the high

258 correlation between the assays ( $\rho > 0.84$  for all three combinations, with the highest correlation  
259 between spike and its RBD; Figure 2c). Our final determination of sample positivity in seroprevalence  
260 settings therefore requires that it exceeds the thresholds of at least 2 out of 3 antigens. As can be  
261 seen in Figure 2C, this strategy eliminates the false positive calls for the individual antigens (red dots)  
262 while retaining similar sensitivity (combined specificity of 100% and sensitivity of 91%).  
263

### 264 **Harmonization between platforms and testing the WHO standards**

265 To compare our ELISA-based assays with others, we tested them using WHO international reference  
266 panel 20/268, comprised of five samples (Negative, Low, Mid, High, and Low S/High N; Figure 3,  
267 Supplementary figure 9) and expressed the results in BAU mL<sup>-1</sup> by comparing signals to the WHO  
268 International Standard (20/136). For this, we used single-point measurements from dilutions that  
269 were within the linear range of the International Standard curve (Toronto) or the median of three  
270 dilutions (Ottawa). For all five samples, the median results from both labs were highly correlated ( $\rho =$   
271 1 for spike and N, 0.9 for RBD) and were between 0.5–2 fold of the geometric mean (red line with half  
272 arrows) reported in a multi-lab comparison by WHO<sup>14</sup>. Importantly, by applying a conversion formula  
273 to our relative ratios for expression in BAU mL<sup>-1</sup> (Figure 3d, Supplementary Table 3), our results can be  
274 readily compared to other national or international efforts. Using this formula, plasma or serum  
275 seropositivity thresholds for IgG are 34, 31, and 11 BAU mL<sup>-1</sup> for nucleocapsid, RBD, and spike  
276 respectively (Toronto). When samples are diluted 1:2560, the assays can detect values up to 5344,  
277 4454 and 1500 BAU mL<sup>-1</sup> for N, RBD, and spike respectively.  
278

### 279 **DBS testing**

280 For serosurveillance, it is important to capture broad swaths of the Canadian population, and at-home  
281 sample collection is ideal for this, especially during times of lockdown or restricted movement. DBSs  
282 are easier to collect, more stable at room temperature, and considered non-hazardous when dried<sup>18,</sup>  
283<sup>19</sup>. We optimized the elution concentrations for both the colorimetric and automated assays (see  
284 Methods), and then compared the results of DBS samples and matching plasma samples using  
285 reference samples created by the National Microbiology Laboratory (NML; panel 1, with a total of 26  
286 different DBSs and matching plasma samples; Supplementary figure 10a). Using NML panel 3, we also  
287 found a high correlation in signal between different punch sizes at a constant ratio of punch area to  
288 elution volume (Supplementary figure 10b).  
289

290 However, despite this high correlation between the two sample types, the higher relative ratios of  
291 DBS samples compared to plasma or serum samples shifted the positive and negative density  
292 distributions, making direct application of the plasma/serum thresholds inappropriate for scoring  
293 seropositivity using DBSs (Supplementary figure 10c). ROC analysis was therefore performed in  
294 Toronto and in Ottawa on panel 4, also supplied by the NML (Tables 2 and 3, Supplementary figures  
295 11 and 12), yielding sensitivities of 98% for spike and its RBD and 92% for N at a 1% false positive rate  
296 threshold in Toronto. By requiring 2 out of 3 calls to be positive, the specificity increased to 100% and  
297 the sensitivity was 98%. In Ottawa, at a 3% FDR, the assays achieved 100% sensitivity for each antigen  
298 with false positive rates of 2% for spike, 1% for its RBD, and 6% for N. When requiring 2 out of 3 calls  
299 to be positive, specificity and sensitivity were both 98%. In the final protocol, we opted to use two 3  
300 mm (3.2 mm in Ottawa) punches, as this enables more flexibility and reproducibility when collections  
301 are not ideal (which would be typical of self-collection). The minimal sample requirement means the  
302 analysis can still be performed even when full DBSs are not provided.  
303

304 **snELISA**

305 We previously reported an ELISA-based test that functions as a surrogate to more complex  
306 neutralization assays employing live viruses, at least with regards to assessing antibodies that prevent  
307 the interaction of spike with the ACE2 receptor<sup>13</sup>. In this snELISA, a sample is added to a plate coated  
308 with RBD or spike antigens (Figure 1a). Instead of a secondary antibody, biotinylated ACE2 is added  
309 followed by streptavidin-HRP. If antibodies from the sample recognize the antigen, they will block  
310 biotinylated ACE2 from binding, leading to decreased signal when HRP substrate is added. The  
311 biotinylated ACE2 was first tested in a manual colorimetric assay using recombinant antibody and  
312 known negative and positive samples (Supplementary Figure 13). Both the full-length spike trimer and  
313 the RBD domain (319–541 construct) were comparable to prior reagents produced at smaller scale.  
314 The assay was then transferred to an automated 384-well chemiluminescent format. Using a panel of  
315 samples from the Canadian Blood Services and from two donors after one or two doses of the  
316 BNT162b2 (aka Comirnaty; Pfizer-BioNTech) mRNA vaccine, the dose response curves between spike  
317 and its RBD were significantly correlated ( $\rho = 0.90$ ; Figure 4A, Supplementary figure 13).

318  
319 The snELISA was also implemented on the Ottawa automated platform. Titration of the coating  
320 antigen, streptavidin-HRP polymer, and luminescent substrate were performed with varying amounts  
321 of biotinylated ACE2 to establish the concentrations with optimal sensitivity, appropriate dynamic  
322 range, and a minimized hook effect at high ACE2 concentrations (Supplementary figure 14). The final  
323 concentration of ACE2 per well was established at 6.5 ng, using 100 ng/well of coated antigen and the  
324 substrate diluted 1:2. Using these conditions, we were able to generate consistent neutralization  
325 efficiency measurements with serum and plasma (Figure 4B, Supplementary figure 15), enabling us to  
326 calculate effective concentration for 50% inhibition (EC50) values for convalescent sera and in sera  
327 from doubly vaccinated individuals. We also tested a panel of 121 positive and six negative samples  
328 from the *Stop the Spread Ottawa* study as single point measurements at a 1:5 dilution using spike as  
329 the antigen (Figure 4C). Convalescent samples ranged from 0–100% inhibition, with a median value of  
330 70%. The six negative samples ranged from 0–32% inhibition with a median of 26%, consistent with  
331 our previous observation that pre-pandemic samples can achieve partial inhibition of the spike-ACE2  
332 interaction due to cross-reactivity of antibodies targeting seasonal coronaviruses<sup>20</sup>. For DBS samples,  
333 four 3 mm punches eluted in 100  $\mu$ L of PBS from a double-vaccinated individual showed measurable  
334 neutralization activity (Supplementary figure 15); however, we were unable to measure neutralization  
335 in DBS samples from convalescent or singly vaccinated individuals (in contrast to serum). Therefore,  
336 while it is possible to detect neutralization activity from DBSs, this is limited to samples with high  
337 neutralizing activity. Additionally, DBS samples might not be ideal for quantitative neutralization  
338 measurements, as sample quality, paper saturation, and disc punching consistency can interfere with  
339 the reproducibility and reliability of the results.

340  
341 The final development performed with the snELISA was to correlate binding inhibition to international  
342 units (IUs) of the WHO International Standard (Figure 4D). By titrating the standard, we established  
343 the correlation between binding inhibition and IUs within the linear range of the curve, with 0.251 IUs  
344 being required to inhibit ACE2-spike interaction by 50% (EC50). We then tested the WHO reference  
345 panel 20/268 by snELISA using spike (Ottawa) or RBD (Toronto) as antigens (Figure 3E). For the low,  
346 mid and high samples, results from Toronto and Ottawa were between 0.5–2 fold of the geometric  
347 mean (red line with half arrows) reported in a multi-lab comparison by the WHO<sup>14</sup>. For the low S,  
348 high N sample, there was no inhibition of ACE2 binding in the snELISA using RBD as the antigen, in  
349 contrast to the snELISA using full-length spike which detected inhibition levels similar to the WHO



350 study. Given the numerous different protocols and strategies that are being used to measure  
351 neutralizing antibodies such as spike-pseudotyped lentiviral assays, plaque reduction neutralization  
352 tests (PRNT) and the snELISA, transforming the data to IUs will enable more robust cross-laboratory  
353 and cross-assay correlations to be performed.

### 354 355 **Visualization of the results of seroprevalence and vaccination studies**

356 As defined above, the assays optimally use the IgG responses to three antigens (spike, RBD, N) to  
357 report seropositivity resulting from SARS-CoV-2 infection. To illustrate how vaccination cohorts differ  
358 from infected cohorts, we re-plotted a subset of the data from our training set (positives and  
359 negatives) as pairwise comparisons of spike and N on scatterplots, with the color intensity mapping to  
360 that of RBD (Figure 5A). We also replotted data from a cohort of vaccinated patients on dialysis <sup>21</sup>  
361 prior to vaccination and 6 weeks afterward (Figure 5B). As expected, the infected cohort contained  
362 samples largely positive for all three antigens tested, while the vaccinated cohort largely consisted of  
363 samples positive for spike and its RBD, but negative for N, which is not targeted by vaccines used in  
364 Canada. This type of visualization helps define individuals with evidence of infection from those with  
365 antibodies resulting from vaccination.

### 366 367 **Discussion**

368  
369 In this paper, we describe a toolkit and protocols for both SARS-CoV-2 serosurveillance and  
370 vaccination response profiling that we applied to populations studies in Canada. We have validated  
371 these reagents, produced and made available by the NRC, in two separate laboratories. The results  
372 can be expressed as relative ratios or can be converted into international units (BAU mL<sup>-1</sup> for antibody  
373 detection, IU mL<sup>-1</sup> for antibody neutralization) to facilitate comparisons between labs and with studies  
374 proposing correlates of protections based on these units <sup>22</sup>. We validated antibody detection and  
375 surrogate neutralization assays in 96-well format (manual colorimetric assays) and on two different  
376 384-well automated chemiluminescent platforms, enabling these reagents to be used at small-scale in  
377 laboratories with basic equipment and in dedicated high-throughput facilities equipped with different  
378 automation equipment.

379  
380 All vaccines approved for use in Canada (also in USA and Europe) use spike as the immunogen <sup>23-25</sup>.  
381 For those who have been vaccinated, responses to spike (and its RBD) are expected, whereas a  
382 response to N is only expected after infection. Thus, it is of value to focus on these two orthogonal  
383 readouts when detecting and characterizing immune responses <sup>26</sup>. Adding the spike RBD as a third  
384 antigen increases specificity [of the three antigens, it is the least conserved in coronaviruses <sup>27-29</sup>] and  
385 provides insight into possible protection, as it is also the antigen most correlated with neutralization  
386 potential <sup>13, 30, 31</sup>.

387  
388 By definition, single point assays must make compromises in defining antigen/antibody/detection  
389 antibody amounts to ensure that a large fraction of measurements are within the linear range of  
390 quantification. Here, we have optimized the concentrations of the serum/plasma/DBS eluates used to  
391 capture the most positives (i.e. convalescent individuals) possible without inducing a hook effect. Still,  
392 in samples with very high antibody levels (including those from healthy individuals following two  
393 doses of vaccine), the measured antibody levels will saturate the assay, thereby preventing their  
394 accurate measurement. When the relative amounts of antibodies detected across samples is

395 important to measure, expanded dilutions should be performed (note that this drastically decreases  
396 assay throughput and increases costs). As a compromise, in vaccinated cohorts, we routinely perform  
397 two-point dilution (16-fold difference) assays that expand the range of concentrations that can be  
398 measured in the linear range of quantification, from 1 BAU mL<sup>-1</sup> to 1500 BAU mL<sup>-1</sup> for spike, and from  
399 3 BAU mL<sup>-1</sup> to 4454 BAU mL<sup>-1</sup> for RBD.

400  
401 We also optimized our seropositivity thresholds to limit false positives, both by providing a stringent  
402 definition of positivity in each assay, and by requiring that this positivity threshold be met in two  
403 separate assays to establish overall positivity in seroprevalence studies. While we felt this was  
404 essential to avoid inflating the positive calls in low prevalence settings, it may affect the overall  
405 sensitivity of the assays, especially following recent infection/vaccination (where seroconversion for  
406 anti-spike often precedes that of RBD and N<sup>8</sup>) or as antibody levels decay. Other limitations stem  
407 from the selection of antigens, as those used in these assays are from the original Wuhan-Hu-1 strain,  
408 and it is possible that decreased sensitivity occurs when testing patients infected with variants,  
409 especially Omicron which has 30 amino acid substitutions (15 within the RBD), three small deletions  
410 and one small insertion in the spike coding sequence<sup>32</sup> [though our initial results with non-vaccinated  
411 Omicron-infected convalescents indicate detection of anti-RBD IgG on this assay; optimization of  
412 assays based on Omicron sequences is ongoing]. Lastly, as assays using N generally have poorer  
413 specificity and sensitivity (at our defined thresholds) than RBD- and spike-based assays, they may not  
414 be ideal as a stand-alone method to define vaccine breakthrough infections, unless serial blood  
415 samples are available (in which case an increase in anti-N levels would indicate that an infection has  
416 occurred). Further assay development will include additional viral antigens not contained in the  
417 vaccines to increase the detection sensitivity for antibodies produced in breakthrough infections. The  
418 control over reagent production and quality, and the flexibility of the ELISA platforms to  
419 accommodate new antigens also provide a rapid route to testing immune responses to variants. All  
420 reagents and protocols are publicly available to enable the rapid deployment of these assays.

421  
422 The validated automated ELISA assays described here are currently being used in multiple Canadian  
423 studies (with >150,000 unique samples profiled to date). These include large serosurveys that monitor  
424 the global (and regional) humoral response (from both infection and vaccination) in the Canadian  
425 population, including the Canadian COVID-19 Antibody and Health Survey from Statistics Canada<sup>2</sup>,  
426 seroprevalence studies with Canadian Blood Services<sup>33, 34</sup>, the Action to Beat Coronavirus study<sup>35</sup>,  
427 and the Canadian Partnership for Tomorrow's Health study<sup>36</sup>. Additionally, these assays are used in >  
428 30 studies focused on infection and/or vaccine responses across different cohorts, e.g. in persons  
429 predicted to have a weaker immune response (based, for example on age<sup>37</sup> or health conditions<sup>38</sup>),  
430 or who are likely to be exposed to infection from the workplace. The results of the assays have  
431 critically helped informed public health decisions. Based on, e.g. a weak response to vaccine in older  
432 adults or patients on dialysis<sup>21, 39</sup>, or the decline in antibody levels post-dose 2 in residents of long-  
433 term care homes<sup>40, 41</sup>, prioritizations were made for second doses, vaccine type was recommended,  
434 or additional doses were accelerated in the populations studied. Combined with other studies  
435 coordinated by the COVID-19 Immunity Task Force (CITF)<sup>42</sup>, our serology studies help guide Canada's  
436 response to the COVID-19 pandemic.

437

## 438 **Methods**

439

### 440 **Protein production**

441 **Spike trimer:** The SARS-CoV-2 spike ectodomain construct (SmT1) from the Wuhan-Hu-1 strain with  
442 S1/S2 furin site mutations, K986P/V987P prefusion-stabilizing mutations, and human resistin as a  
443 trimerization partner<sup>15</sup> was produced using stably transfected Chinese Hamster Ovary (CHO) pools  
444 (CHO<sup>BRI/2353™</sup> cells) and purified as described<sup>8</sup>. To prepare reference material aliquots for distribution  
445 by the National Research Council of Canada (NRC) Metrology Research Centre, the bulk purified  
446 protein was formulated in PBS supplemented with 10 mM HEPES sodium salt. After aliquoting and  
447 one freeze-thaw cycle, protein integrity and purity were assessed by sodium dodecyl sulfate-  
448 polyacrylamide gel electrophoresis (SDS-PAGE; Figure 1B) and analytical size-exclusion ultra-high  
449 performance liquid chromatography (SEC-UPLC; Supplementary figure 1, Supplementary table 1). SEC-  
450 UPLC was run on an Acquity H-Class Bio UPLC system (Wyatt Technology, Santa Barbara, CA, USA) in  
451 phosphate buffered saline (PBS) + 0.02% Tween-20 on a 4.6 × 300 mm Acquity BEH450 column (2.5  
452 μm bead size; Waters Limited, Mississauga, ON, Canada) coupled to a miniDAWN Multi-Angle Light  
453 Scattering (MALS) detector and Optilab T-rEX refractometer (Wyatt).

454  
455 **Nucleocapsid:** N cDNA (corresponding to amino acids 1–419 of YP\_009724397, Wuhan-Hu-1 strain)  
456 was synthesized by GenScript (Piscataway, NJ, USA; using *Cricetulus griseus* codon bias) with a C-  
457 terminal FLAG-Twin-Strep-tag-(His)<sub>6</sub> tag and cloned into the pTT5<sup>®</sup> expression plasmid (NRC) to create  
458 NCAP<sup>43</sup>. Expression by transient transfection of CHO<sup>BRI/55E1™</sup> cells was performed using a previously  
459 described high cell density method<sup>15</sup>. Since a significant proportion of N was released from  
460 transfected cells despite high viability, it was purified from the culture supernatant. Following  
461 centrifugation and filtration, supernatant harvested 7 d post-transfection was purified by immobilized  
462 metal affinity chromatography (IMAC) on a Ni Sepharose Excel column (Cytiva, Vancouver, BC,  
463 Canada). The column was washed with 50 mM sodium phosphate buffer (pH 7.0) containing 25 mM  
464 imidazole and 300 mM NaCl, and N was eluted with 50 mM sodium phosphate buffer (pH 7.5)  
465 containing 300 mM imidazole and 300 mM NaCl. N was further purified by affinity chromatography  
466 on a StrepTrap XT Chromatography Column (Cytiva) equilibrated in Buffer W (100 mM Tris pH 8.0, 150  
467 mM NaCl). The column was washed with Buffer W and bound protein was eluted with Elution Buffer  
468 (Buffer W supplemented with 50 mM biotin and 1 mM ethylenediaminetetraacetic acid (EDTA)).  
469 Purified N was buffer exchanged into Dulbecco's PBS (PBS) using a CentriPure P100 Gel Filtration  
470 Column (Apex Scientific, Maynooth, Ireland), sterile-filtered through a 0.2 μm membrane, and stored  
471 at -80°C. For preparation of reference material aliquots (NCAP-1) for distribution by National Research  
472 Council of Canada (NRC) Metrology, the bulk purified protein was processed through an additional  
473 buffer exchange in 50 mM Tris-HCl pH 8.0 supplemented with 150 mM sodium chloride. N integrity  
474 and purity was analyzed by SDS-PAGE and analytical SEC-HPLC, which was run in PBS supplemented  
475 with 200 mM arginine on a 5 × 150 mm Superdex 200 HR column (Cytiva).

476  
477 **RBD:** Amino acids 331–521 of the SARS-CoV-2 spike protein (YP\_009724390.1, Wuhan-Hu-1 strain)  
478 were cloned into the pTT5<sup>®</sup> vector using EcoRI and BamHI. The construct encodes an N-terminal  
479 human interleukin 10 signal peptide (MHSSALLCCLVLLTGVRA) followed by a Twin-Strep-tag II-(His)<sub>6</sub>-  
480 FLAG tag fused to the RBD N-terminus. The construct was expressed by transient gene expression in  
481 CHO<sup>BRI/55E1™</sup> cells as described above<sup>15</sup>. Clarified culture supernatant harvested 8 d post-transfection  
482 was purified by IMAC on Ni Sepharose Excel columns as above. The IMAC eluate was buffer-  
483 exchanged using NAP-25 columns (Cytiva) into PBS before a second affinity purification step using  
484 Strep-Tactin XT Superflow (IBA Lifesciences, Göttingen, Germany), following the manufacturer's  
485 instructions. The pooled eluate (de-salted into PBS and concentrated) was applied to a Superdex-75  
486 gel filtration column (Cytiva). SEC fractions containing RBD with low levels of high-molecular-weight

487 contaminants were pooled. The second RBD construct (RBD<sup>319-541</sup>) consists of amino acids 319–541  
488 with a C-terminal (His)<sub>6</sub>-FLAG tag. The protein was expressed and purified as described for RBD<sup>331-521</sup>,  
489 except the Strep-Tactin XT purification step was omitted.

490  
491 RBD and N antigens were compared against previously validated antigens produced by the Rini and  
492 Sicheri laboratories, respectively, and described in <sup>8,13</sup>.

493  
494 **Recombinant antibody production:** VHH and mAb sequences were synthesized by GenScript using *C.*  
495 *griseus* codon bias and cloned into the pTT5<sup>®</sup> plasmid. The llama single domain antibody (VHH)  
496 VHH72 was described previously (PDB entry 6WAQ\_1) <sup>17</sup>. Additional VHHs (NRCov2-04 and NRCov2-  
497 20) were isolated in-house from llamas immunized with recombinant SARS-CoV-2 trimeric spike  
498 ectodomain Smt1 (Supplementary figure 2). VHH sequences were fused to an antibody-dependent  
499 cell-mediated cytotoxicity (ADCC)-attenuated human IgG1 Fc domain (hFc1X7, from patent US 2019  
500 352 383A1) to generate VHH72-Fc, NRCov2-04-Fc and NRCov2-20-Fc. The anti-human-IgG  
501 monoclonal antibodies (mAbs) IgG#5 and IgG#6 were derived from mice immunized with human IgG;  
502 heavy chain (HC) and light chain (LC) variable domain sequences (VH and VL) were fused to mouse  
503 IgG2a and mouse kappa LC constant domain sequences, respectively, to express full-length mAbs. The  
504 HC was fused in-frame at its C-terminus with ferric HRP (PDB: 1W4W\_A) to create IgG#5-HRP and  
505 IgG#6-HRP. These mAbs were also tested as HRP conjugates (rather than HRP fusions) as described in  
506 Supplementary figure 6. For protein production, VHH or mAb HC/LC (50:50 w/w) plasmids were  
507 transfected into CHO<sup>BRI/55E1™</sup> cells using PEI-Max transfection reagent (Polysciences, Warrington, PA,  
508 USA) as described previously <sup>13,15</sup>. Clarified 0.2 µm-filtered supernatants were loaded on 5 mL HiTrap  
509 MabSelect SuRe columns (Cytiva) equilibrated in PBS, and the columns were washed with PBS prior to  
510 antibody elution with 100 mM citrate buffer, pH 3.6. The eluted antibodies were formulated in PBS by  
511 buffer exchange using NAP-25 columns. Purified proteins were quantified based on their absorbance  
512 at 280 nm and analyzed by analytical size-exclusion on an Acquity BEH200 column (Waters) by UPLC-  
513 MALS system (as described above for the spike trimer) or on a 5 × 150 mm Superdex 200 HR column  
514 (Cytiva) coupled to a high-performance liquid chromatography (SEC-HPLC) system (Waters).

515  
516 **Biotinylated ACE2 production:** The human ACE2 (UniProtKB-Q9BYF1) cDNA was synthesized by  
517 GenScript and optimized for expression in CHO cells. The construct encodes a human interleukin 10  
518 signal peptide (MHSSALLCCLVLLTGVRA) followed by a Twin-Strep-tag II-(His)<sub>6</sub>-FLAG tag on the N-  
519 terminus of the mature ACE2 receptor ectodomain (amino acids 20–613). A biotin acceptor peptide  
520 (BAP) sequence (GLNDIFEAQKIEWHE) was added in-frame at the ACE2 C-terminus. The cDNA was  
521 cloned into pTT5<sup>®</sup> using EcoRI and BamHI. The ACE2-BAP cDNA was expressed by transient gene  
522 expression in CHO<sup>BRI/55E1™</sup> cells as described <sup>15</sup> with the addition of 5% (w/w) pTT5<sup>®</sup>-BirA (an  
523 *Escherichia coli* biotin ligase) expression plasmid as described previously <sup>44</sup>. Clarified culture  
524 supernatant harvested 8 d post-transfection was purified by IMAC on Ni Sepharose Excel columns as  
525 described for N above. The IMAC eluate was buffer-exchanged using NAP-25 columns into PBS before  
526 a second affinity purification step using Strep-Tactin XT Superflow. The pooled eluate (buffer-  
527 exchanged into PBS as above) was stored at -80°C. Biotinylated ACE2 from the NRC was compared  
528 against biotinylated ACE2 produced in the Rini lab and previously described in <sup>13</sup>.

529  
530 **Participant recruitment and study approval**

531 All research was performed in accordance with Canada's Tri-Council Policy Statement: Ethical Conduct  
532 for Research Involving Humans. External samples and data were transferred via Materica and Datal

533 Transfer Agreements as appropriate. Samples were de-identified prior to transfer to the assay  
534 laboratory.

535 For Toronto cohorts: Negative control serum samples were from patients enrolled in cancer studies  
536 pre-COVID-19 (prior to November 2019; Mount Sinai Hospital (MSH) Research Ethics Board (REB)  
537 studies #01-0138-U and #01-0347-U), which were archived and frozen in the Lunenfeld-Tanenbaum  
538 Research Institute (LTRI) Biobank. Convalescent serum samples were obtained from in- and out-  
539 patients with polymerase chain reaction (PCR)-confirmed COVID-19 by the Toronto Invasive Bacterial  
540 Diseases Network in Toronto and the regional municipality of Peel, Ontario (REB studies #20-044  
541 Unity Health Network, #02-0118-U/05-0016-C, MSH). Specimen-only Canadian Blood Services (CBS)  
542 serum donations were collected from individuals who met one or more of the following criteria: (a)  
543 indicated they had a SARS-CoV-2-positive PCR test, (b) a declaration of having been a close contact of  
544 a COVID-19 case, (c) a travel history and clinical presentation compatible with COVID-19, and (d) signs  
545 and symptoms compatible with COVID-19. ELISAs were conducted at the LTRI with MSH Research  
546 Ethics Board (REB) approval (study number: 20-0078-E). Samples from vaccinated individuals were  
547 obtained from Sunnybrook Health Sciences Centre (REB study #4814, Sunnybrook, #21-0049-E, MSH)  
548 and from MSH (REB study #20-0144-A).

549 For Ottawa cohorts: Pre-pandemic serum and plasma samples were collected between April 2015 and  
550 December 2019 from diverse sources, including the Eastern Ontario Regional Laboratory Association  
551 (EORLA) and the Ottawa Hospital (TOH). Pediatric samples were acquired from the BC Children's  
552 Hospital Biobank (BCCHB) in Vancouver, BC, Canada (REB#: H-07-20-6009). Pandemic samples were  
553 collected from longitudinal studies of severe and mild hospitalized cases of COVID-19 (REB # H-04-20-  
554 5727 and # H-11-20-6172), and from a surveillance study of at-risk and convalescent individuals called  
555 *Stop the Spread Ottawa* (REB # H-09-20-6135) at the Ottawa Hospital Research Institute and the  
556 University of Ottawa.

557

### 558 **Sample collection, handling, and viral inactivation**

559 Serum and plasma collection: Samples were collected using standard phlebotomy procedures at  
560 collection sites or self-collected by individuals after capillary puncture. In Toronto, inactivation of  
561 potential infectious viruses in plasma or serum was performed by incubation with Triton X-100 to a  
562 final concentration of 1% for 1 h prior to use<sup>8,45</sup>. Serum and plasma samples collected and processed  
563 in Ottawa did not require viral inactivation, as they were handled and tested within the University of  
564 Ottawa CL2+ biocontainment facility.

565

566 DBS preparation: Samples were prepared at the National Microbiology Laboratory of Canada (NML) as  
567 in<sup>46</sup>. For panels 1–3, plasma from SARS-CoV-2 antibody-positive COVID-19 convalescent donors (MSH,  
568 Toronto) and SARS-CoV-2-negative donors (NML, Winnipeg) were used to generate matched plasma  
569 and contrived DBS samples. For contrived DBS samples, fresh SARS-CoV-2 antibody-negative blood  
570 was centrifuged, the plasma was removed, and the red blood cells were resuspended 1:1 in antibody-  
571 positive plasma and spotted (5 × 75 µL) onto Whatman 903 Protein Saver Cards (GE Healthcare,  
572 Boston, MA, USA), which were dried at room temperature overnight, then stored with desiccant in  
573 gas-impermeable bags at -80°C until testing. SARS-CoV-2 antibody-negative blood was spotted  
574 directly from EDTA Vacutainer tubes onto DBS cards. For panel 4, both positive and negative blood  
575 samples were spotted directly from EDTA tubes. All matched plasma and contrived DBS samples were  
576 tested using the anti-SARS-CoV-2 ELISA IgG kit (EUROIMMUN, Lübeck, Germany), according to the  
577 manufacturer's instructions, to verify that donors were either positive or negative for SARS-CoV-2  
578 antibodies prior to shipping to Toronto and Ottawa.

579

580 DBS handling: Toronto: Samples from DBS cards were punched manually using a 6 mm punch or in a  
581 semi-automated manner using a BSD600 Ascent puncher (BSD Robotics, Brisbane, QLD, Australia)  
582 with the indicated punch size. We first compared 6 mm circle punches from contrived DBSs and  
583 matching plasma samples (Supplementary figure 10) by eluting the punches in 250  $\mu\text{L}$  PBST plus 1%  
584 Triton X-100 (0.226  $\text{mm}^2 \mu\text{L}^{-1}$  eluate). After this initial test, to ensure sufficient eluate to test all three  
585 antigens from 1 or 2 3-mm punches, we selected a final elution ratio of 0.176  $\text{mm}^2 \mu\text{L}^{-1}$  elution buffer  
586 (i.e. 80  $\mu\text{L}$  for 2  $\times$  3 mm punches). Eluted samples were centrifuged at 1,000  $\times g$  for 30 s before  
587 transfer to 96-well plates. Eluates were diluted 1:4 in 1.3% Blocker BLOTTO (Thermo Fisher Scientific,  
588 Waltham, MA, USA) to a final concentration of 1% in PBST, unless otherwise specified.

589

590 DBS handling: Ottawa: Samples from DBS cards were punched manually or in a semi-automated  
591 manner using a DBS puncher (PerkinElmer, Woodbridge, ON, Canada; 3.2 mm discs) or a BSD600  
592 Ascent puncher (BSD Robotics; 3 mm discs) and eluted in 100  $\mu\text{L}$  per disc PBS + 1% Triton X-100 for up  
593 to 16 h (minimum 4 h) in 96-well U-bottom plates on a shaker at room temperature. Elution  
594 optimization data are presented in Supplementary Figure 7. Eluates were centrifuged at 216  $\times g$  for 2  
595 min and diluted 1:2 in 2% milk + PBST for a final concentration of 1% milk in PBST.

596

#### 597 **Colorimetric direct ELISAs: Toronto protocol**

598 Manual colorimetric ELISAs were adapted from assays described in <sup>8, 13</sup>. Antigens (spike trimer, RBD  
599 331–521, and N) at the indicated amounts (in ng, see Supplementary table 2 for optimized amounts)  
600 were diluted in 50  $\mu\text{L}$  PBS and adsorbed onto a 96-well high-binding polystyrene Greiner Bio-One  
601 plate (Thermo Fisher Scientific, #655061) overnight at 4°C. Wells were washed three times with 200  
602  $\mu\text{L}$  PBST and then blocked with 200  $\mu\text{L}$  3% w/v milk powder (BioShop Canada Inc., Burlington, ON,  
603 Canada, #ALB005.250) in PBST for 1–2 h at room temperature. Samples were diluted as indicated in  
604 50  $\mu\text{L}$  of 1% w/v (final) milk powder in PBST and added to each plate. A standard curve of recombinant  
605 antibody was added to each plate in 50  $\mu\text{L}$  1% w/v milk powder in PBST at the indicated  
606 concentrations. For spike and its RBD, the recombinant antibodies used were VHH72-Fc (NRC; see  
607 above), human anti-spike S1 IgG (clone HC2001, GenScript, #A02038), human anti-Spike S1 IgM (clone  
608 hIgM2001, GenScript, #A02046), and human anti-spike IgA (clone CR3022, Absolute Antibody, Oxford,  
609 United Kingdom, #Ab01680-16.0). For N, the antibodies used were human anti-nucleocapsid IgG  
610 (clone HC2003, GenScript, #A02039), anti-nucleoprotein IgM (CR3018 (03-018), Absolute Antibody,  
611 #Ab01690 -15.0), and anti-nucleoprotein IgA (CR3018 (03-018), Absolute Antibody, #Ab01690 -16.0).  
612 Negative control antibodies purified from human serum (final 1  $\mu\text{g mL}^{-1}$ ; human IgG, Sigma-Aldrich,  
613 Oakville, ON, Canada, #I4506; human IgM, Sigma-Aldrich #I8260, human IgA, Sigma-Aldrich, #I4036)  
614 and pools of positive and negative sera from 3–4 patients were added to each plate in 50  $\mu\text{L}$  1% w/v  
615 milk powder in PBST for quality control and to enable cross-plate comparisons. Samples were  
616 incubated for 2 h at room temperature, and wells were washed three times with 200  $\mu\text{L}$  PBST. Anti-  
617 human secondary antibodies (recombinant anti-human IgG#5-HRP, goat anti-human IgG Fcy-HRP  
618 (Jackson ImmunoResearch Labs, West Grove, PA, USA, #109-035-098), goat anti-human IgM fc5u-HRP  
619 (Jackson ImmunoResearch Labs, #109-035-129), and goat anti-human IgA  $\alpha$  chain-HRP (Jackson  
620 ImmunoResearch Labs, #109-035-127) were added to the plate at the indicated dilutions in 50  $\mu\text{L}$  1%  
621 w/v milk powder in PBST and incubated for 1 h at room temperature. Wells were washed three times  
622 with 200  $\mu\text{L}$  PBST, then 50  $\mu\text{L}$  of 1-Step Ultra TMB-ELISA Substrate Solution (Thermo Fisher Scientific,  
623 #34029) was added for 15 min at room temperature. The reaction was quenched with 50  $\mu\text{L}$  Stop  
624 Solution for TMB Substrates (Thermo Fisher Scientific, #N600). The plates were read at 450 nm in a

625 Cytation 3 Cell Imaging Multi-Mode Reader (BioTek Instruments Inc., Winooski, VT, USA). Blank values  
626 (the mean of the blanks in each 96-well plate) were subtracted from all raw reads prior to data  
627 analysis.

628

#### 629 **Colorimetric direct ELISA: Ottawa protocol**

630 Manual colorimetric ELISAs were modified from the assay described in <sup>47</sup>. High protein-binding  
631 Immulon 4 HBX clear 96-well plates (VWR International, Mississauga, ON, Canada, #62402-959, note  
632 these plates have also been tested and validated in Toronto) were coated with 50  $\mu\text{L}$  of 2  $\mu\text{g mL}^{-1}$   
633 antigen (spike, RBD 319–541, and N diluted in sterile PBS (WISENT Inc, St-Bruno, QC, Canada, #311-  
634 010-CL)) were incubated at 4°C on a shaker overnight. The next day, coated plates were washed three  
635 times with 200  $\mu\text{L}$  of PBST and blocked with 200  $\mu\text{L}$  of 3% w/v skim milk powder in PBST for 1 h at  
636 room temperature on a shaker at 700 rpm. The blocking buffer was removed, and plates were  
637 washed three times with 200  $\mu\text{L}$  PBST. Serum and plasma samples were diluted in 1% w/v skim milk  
638 powder in PBST. An isotype-specific standard curve was included on each plate to enable cross-plate  
639 comparison: anti-SARS-CoV-2 S CR3022 Human IgG1 (Absolute Antibody, Ab01680-10.0), anti-SARS-  
640 CoV-2 S CR3022 Human IgA (Absolute Antibody, Ab01680-16.0), or anti-SARS-CoV-2 S CR3022 Human  
641 IgM (Absolute Antibody, Ab01680-15.0). Serum/plasma samples, standard curve, positive and  
642 negative controls, and blanks (100  $\mu\text{L}$ /well in 1% w/v skim milk in PBST) were added and incubated for  
643 2 h at room temperature on a plate shaker at 700 rpm. The plates were washed four times with 200  
644  $\mu\text{L}$  PBST, HRP-linked secondary antibody diluted in 1% milk in PBST (50  $\mu\text{L}$ ) was added, and the plate  
645 was incubated for 1 h at room temperature on a shaker at 700 rpm. The final isotype-specific  
646 secondary antibodies used were anti-human IgG#5-HRP (Supplementary figure 6), anti-human IgA-  
647 HRP (Jackson ImmunoResearch Labs, 109-035-011), and anti-human IgM-HRP (Jackson  
648 ImmunoResearch Labs, 109-035-129). Plates were washed four times with 200  $\mu\text{L}$  PBST and  
649 developed using 100  $\mu\text{L}$  of SIGMAFAST OPD Tablets (Sigma-Aldrich, P9187) dissolved in 20 mL Gibco  
650 Water for Injection for Cell Culture (Thermo Fisher Scientific, A1287301, final concentration of 0.4 mg  
651  $\text{mL}^{-1}$  OPD, 0.4 mg  $\text{mL}^{-1}$  urea hydrogen peroxide, and 0.05 M phosphate-citrate, pH 5.0). After 10 min  
652 of incubation in the dark, the reaction was stopped with 50  $\mu\text{L}$  of 3 M HCl and the absorbance was  
653 measured at 490 nm using a PowerWave XS2 Plate Reader (BioTek Instruments). Wells filled with  
654 dilution buffer were used as background controls and their reads were subtracted from serum values.  
655 Colorimetric assay optimization data are presented in Supplementary figures 5 and 6.

656

#### 657 **Chemiluminescent direct ELISA: Toronto protocol and optimization**

658 Automated chemiluminescent ELISAs were adapted from assays first described in <sup>8</sup>, and performed  
659 using liquid dispensers (Biomek NXP (Beckman, Indianapolis, IN, USA), Multidrop Combi (Thermo  
660 Fisher Scientific)) and a washer (405 TS/LS LHC2 (Biotek Instruments)); all wash steps included four  
661 washes with 100  $\mu\text{L}$  PBST on a Thermo Fisher Scientific F7 Robot System at the Network Biology  
662 Collaborative Centre (nbcc.lunenfeld.ca). All incubations were performed at room temperature.  
663 Antigen (spike trimer, RBD 331–521, or N) at the indicated amounts (ng) were diluted in 10  $\mu\text{L}$  PBS  
664 and dispensed into the wells of a 384-well LUMITRAC 600 high-binding polystyrene Greiner plate  
665 (Thermo Fisher Scientific, #781074). The plate was centrifuged at 233  $\times g$  for 1 min to ensure even  
666 coating, incubated overnight at 4°C, and washed. Wells were blocked with 80  $\mu\text{L}$  of 5% Blocker  
667 BLOTTO for 1 h and then washed. Samples and controls (as in the colorimetric assay) were diluted as  
668 indicated in a final concentration of 1% Blocker BLOTTO in PBST, and 10  $\mu\text{L}$  was added to each well  
669 from 96- or 384-well source plates. Plates were incubated for 2 h, and wells were washed with PBST.  
670 Secondary antibodies (as in the colorimetric assay) were diluted as indicated in 1% Blocker BLOTTO in

671 PBST and 10  $\mu$ L was added to each well. After incubation for 1–2 h, the wells were washed and 10  $\mu$ L  
672 of ELISA Pico Chemiluminescent Substrate (Thermo Fisher Scientific, #37069, diluted 1:4 in ddH<sub>2</sub>O) was  
673 dispensed into each well and mixed at 900 rpm for 10 s. After a 5–20-minute incubation, plates were  
674 read on an EnVision 2105 Multimode Plate Reader (PerkinElmer) at 100 ms/well using an ultra-  
675 sensitive luminescence detector.

676  
677 Protein reagents from the NRC (described above) were first optimized in the 96-well colorimetric  
678 manual assay using recombinant antibodies and serum samples from CBS (Supplementary figure 16).  
679 The final amount of antigen per well was then scaled down by 3.5–4-fold to migrate to 384-well  
680 format for the automated assay. Two concentrations of secondary antibody IgG#5-HRP (0.09 and 0.18  
681  $\mu$ g mL<sup>-1</sup>) were assessed using dilution curves of the VHH72-Fc antibody (to detect spike and its RBD) or  
682 an anti-N antibody (to detect N; Supplementary figure 17), and the best concentration (0.18  $\mu$ g mL<sup>-1</sup>)  
683 was further tested on a dilution series of 32 serum samples provided by CBS (Supplementary figure 3).  
684 We also tested anti-RBD NRCoV2-04-Fc and NRCoV2-20-Fc recombinant calibration antibodies, which  
685 were comparable to VHH72-Fc as reference curves (Supplementary figure 17). For IgA and IgM  
686 detection, reagents were first tested in the colorimetric assay (Supplementary figure 8). For  
687 chemiluminescent assays, 10  $\mu$ L of goat anti-human IgM-HRP (1:10,000; 0.80 ng/well) or goat anti-  
688 human IgA-HRP (1:12,000, 0.66 ng/well) were used as secondary antibodies.

#### 689 690 **Chemiluminescent direct ELISAs: Ottawa protocol and optimization**

691 Automated chemiluminescent ELISAs were based upon and optimized from assays first described in  
692 <sup>48</sup>, and performed using MicroLab Star robotic liquid handlers (Hamilton, Reno, NV, USA) and a 405  
693 TS/LS LHC2 plate washer (Biotek Instruments; all wash steps included four washes with 100  $\mu$ L PBST)  
694 at the University of Ottawa, Faculty of Medicine (Roger Guindon Hall). All incubations were done at  
695 room temperature with shaking at 500–700 rpm. Antigens (spike, RBD 319–541, and N) were diluted  
696 in PBS and dispensed into the wells of a 384-well high-binding polystyrene Nunc plate (Thermo Fisher  
697 Scientific, #460372) at a final amount of 50 ng/well. The plates were centrifuged at 216  $\times$  g for 1 min  
698 to ensure even coating, incubated overnight rocking at 4°C, and washed. Wells were blocked with 80  
699  $\mu$ L of 3% w/v skim milk powder dissolved in PBST for 1 h and then washed. Samples and controls were  
700 diluted as indicated to a final concentration of 1% w/v skim milk powder in PBST and 10  $\mu$ L was added  
701 to each well from a 96-well source plate. Plates were incubated for 2 h and wells were washed.  
702 Secondary antibodies (as in the colorimetric assay) were diluted as indicated in 1% w/v skim milk  
703 powder in PBST and 10  $\mu$ L was added to each well. After incubation for 1 h, the wells were washed  
704 and 10  $\mu$ L of ELISA Pico Chemiluminescent Substrate (diluted 1:2 in MilliQ H<sub>2</sub>O) was dispensed into  
705 each well. After a 5 min incubation with shaking, plates were read on an Neo2 plate reader (BioTek  
706 Instruments) at 20 ms/well and a read height of 1.0 mm.

#### 707 708 **Colorimetric snELISAs: Toronto protocol and optimization**

709 The snELISA assay was performed as described <sup>13</sup> with the indicated antigens and ACE2. All wash steps  
710 included four washes in 200  $\mu$ L PBST. RBD 319–541 or spike was adsorbed onto 96-well high-binding  
711 polystyrene Greiner Bio-One plates (Thermo Fisher Scientific, #655061) at 100 or 200 ng/well,  
712 respectively, in 50  $\mu$ L PBS and incubated overnight at 4°C. Plates were washed, then blocked for 1–1.5  
713 h at room temperature with 200  $\mu$ L 3% bovine serum albumin (BSA; BioShop Canada Inc., SKI400.1).  
714 After washing, serum or plasma was added to the plate at the indicated concentrations in 50  $\mu$ L 1%  
715 BSA in PBST (final concentration) and incubated for 1 h. Wells were washed and incubated with 50  $\mu$ L  
716 of biotinylated recombinant ACE2 as indicated for 1 h. After washing, wells were incubated with 44 ng



717 Streptavidin-Peroxidase Polymer, Ultrasensitive (Sigma-Aldrich, S2438) for 1 h. The resultant signal  
718 was developed and quantified with TMB-ELISA in an identical manner to the colorimetric direct  
719 ELISAs. Due to day-to-day variations in signal, all optical density at 450 nm (OD<sub>450</sub>) values were  
720 normalized to the OD<sub>450</sub> of the well without serum or antibody for each sample. All values are  
721 expressed as ratios.

722

### 723 **Chemiluminescent snELISAs: Toronto protocol**

724 The automated snELISA assay was performed on the same F7 platform as the direct detection ELISA  
725 with the same washing protocol and incubation temperature. Greiner 384-well Lumitrac 600 plates  
726 were coated with RBD 319–541 (34 ng/well) or spike (50 ng/well) following the same protocol as for  
727 direct detection. Before each of the next four steps, the plates were washed four times with PBST: 1)  
728 the wells were blocked with 80 µL 3% BSA in PBST for 1 h; 2) Plasma or serum sample was dispensed  
729 at the indicated dilutions in 10 or 20 µL and incubated for 2 h; 3) 10 µL of ACE2-BAP (2.08 ng/well in  
730 1% BSA in PBST) or ACE2-Rini (17 ng/well in 1% BSA in PBST) was added to each well and the plates  
731 were incubated for 1 h; 4) 10 µL of Streptavidin-Peroxidase Polymer, Ultrasensitive (15 ng/well in 1%  
732 BSA in PBST) was added to each well and the plates were incubated for 1 h. Addition of ELISA Pico  
733 Chemiluminescent Substrate and reading on the EnVision 2105 Multimode Plate Reader (PerkinElmer)  
734 were performed as for direct detection. All values were normalized to blanks (with no samples added)  
735 on the same 384 well plate.

736

### 737 **Chemiluminescent snELISAs: Ottawa protocol**

738 The surrogate neutralization ELISA first described in <sup>13</sup> was adapted and optimized for compatibility  
739 with the Hamilton MicroLab STAR robotic liquid handler. The methods for plate washing steps,  
740 incubations, and data acquisition were as described for the automated chemiluminescent ELISA. 384-  
741 well high-binding polystyrene Nunc plates (Thermo Fisher Scientific, #460372) were coated with 100  
742 ng/well of spike or RBD 319–541, centrifuged in a plate spinner to ensure even coating, and incubated  
743 overnight with rocking at 4°C. Plates were washed, 80 µL of blocking solution (3% w/v skim milk  
744 powder in PBST) was added to each well, and the plates were incubated for 1 h at room temperature  
745 on a shaker at 700 rpm. During the blocking step, serum/plasma samples or DBS eluates were diluted  
746 in skim milk powder in PBST to a final milk concentration of 1% w/v. For single-point neutralizations,  
747 samples were diluted 1:5, or to calculate the half maximal effective concentration (EC<sub>50</sub>), the samples  
748 were titrated using a 5-point curve (1:5, 1:25, 1:125, 1:625, 1:6,250). To facilitate quality control,  
749 downstream analysis, and cross-plate comparisons, standard curves of NRCov2-20-Fc and three  
750 dilutions (1:5, 1:125, and 1:6,250) of pooled positive and negative serum samples were included in  
751 quadruplicate on each plate. Serum-free/ACE2-free and serum-free wells were also included on each  
752 plate to establish the minimum and maximum signals, respectively. Plates were washed, and samples  
753 and controls (20 µL) were added to the wells and incubated for 2 h. Plates were then washed, and 6.5  
754 ng of ACE2-BAP diluted in 1% w/v skim milk powder in PBST was added to each well and incubated for  
755 1 h. Plates were again washed, and Streptavidin-Peroxidase Polymer (Sigma #S2438), diluted in 1%  
756 w/v skim milk powder in PBST at a concentration of 1.25 ng µL<sup>-1</sup> (25 ng/well) was added to each well  
757 and incubated for 1 h. Plates were washed a final time and 20 µL of ELISA Pico Chemiluminescent  
758 Substrate (diluted 1:2 in MilliQ H<sub>2</sub>O) was dispensed into each well. After a 5-min incubation, plates  
759 were read on an Neo2 plate reader (BioTek Instruments) at 20 ms/well and a read height of 1.0 mm.  
760 Assay optimization data are presented in Supplementary Figure 14.

761

### 762 **Data analysis: Toronto**

763 Quality control and determination of relative ratios: Raw values for each sample (luminescence  
764 counts per second) were normalized to a blank-subtracted reference point from the reference curve  
765 ( $0.0156 \mu\text{g mL}^{-1}$  for VHH72-Fc (for spike/RBD) or  $0.0625 \mu\text{g mL}^{-1}$  for anti-N (for N)) to create relative  
766 ratios. For each automated test, the raw values and relative ratios of each control were compared to  
767 those of prior tests to confirm their similarity. The distributions of the raw values of the reference  
768 points and positive controls compared to the blanks and the reference points for each antigen  
769 compared to each other should be within the 90% confidence ellipse of the distributions of previous  
770 tests. In addition, the reference points should be within 15% coefficient of variation (CV) of prior runs.  
771 The  $\log_{10}$  sample density distributions of the raw values and relative ratios were compared to prior  
772 runs to confirm that they were within range. For points outside of these ranges, the individual control  
773 was either removed (e.g. if it was a single outlier out of the four on the plate) or the plate or test was  
774 repeated.

775  
776 Receiver-operating characteristic (ROC) analysis: Samples acquired prior to November 2019 (pre-  
777 COVID) were considered true negatives and samples from convalescent patients with PCR-confirmed  
778 COVID-19 were considered true positives (for IgM and IgA analyses, we selected positives that were  
779 collected 20–40 d post-symptom onset). ROC analysis using relative ratios was performed with the  
780 pROC package in R<sup>49</sup> with default parameters. For IgG (serum/plasma and DBS), the analysis was  
781 performed in duplicate, with individual replicates considered individual samples. To avoid having  
782 samples with technical errors skew the threshold determination, negative plasma samples that were  
783 positive in only one replicate and negative DBS samples whose values were more than four standard  
784 deviations (SDs) from the mean of the log distribution of negative samples were removed from the  
785 analysis.

786  
787 Thresholding based on the control mean: For plasma and serum IgG, negative controls (blanks, IgG  
788 pools,  $0.25$  and  $0.0625 \mu\text{L/well}$  of a negative master mix (including equal volumes of four pre-COVID-  
789 19 samples (N2, N11, N39, N41),  $n = 1,320$  for spike,  $1,248$  each for RBD and N) from 23 experiments  
790 over 4 months were included in the analysis. We used three SDs from the mean of the  $\log_{10}$   
791 distribution of the relative ratios of these negative controls as the threshold for each antigen. The  
792 same strategy was employed for IgA (72 negative controls from two experiments 1 month apart) and  
793 IgM (80 negative controls from three experiments over 2 months).

794  
795 Scoring positives: Positive and negative results were first defined for each antigen, based on the  
796 defined thresholds. For projects where an overall assessment of the confidence of antibody detection  
797 in a sample is required, we imposed a sample-level rule: the sample must have passed positivity in at  
798 least 2 out of 3 antigen tests.

799  
800 Other data analyses: Plots were generated in R using the ggplot2, lattice, latticeExtra, grid, and  
801 gridExtra packages. Correlations between samples were calculated using the cor() function in the R  
802 stats package, using the Spearman method. The density distributions of the log of the signals scaled to  
803 the reference were separated using the normalmixEM mixtool function in the R mixtools package,  
804 based on an expected minimization of only two subpopulations assumed to have a Gaussian  
805 distribution. normalmixEM initialization, mean, and SD parameters were based on visual estimation of  
806 the density distribution of the log of the signal scaled to the reference. The initially assumed  
807 proportion between the two subpopulations was set to 50%. Density distributions were plotted using

808 default R parameters (bandwidth: bw.nrd0, which implements a rule-of-thumb for choosing the  
809 bandwidth of a Gaussian kernel density estimator).

810

811 Calibration to the WHO standard for antibody detection: For each antigen, the relative ratio from the  
812 WHO International Standard (IS, National Institute for Biological Standards and Control (NIBSC, South  
813 Mimms, United Kingdom), Code 20/136, pooled convalescent plasma) at different sample dilutions (in  
814 binding antibody units (BAU) mL<sup>-1</sup>) was represented in log-log scale. The response curve was modelled  
815 by an S-shaped sigmoid curve ( $y = a*x/(1+b*x)+c$ , expressed in log(y), log(x) coordinates). The nls  
816 function (nonlinear least squares) from the R stats package was used to best match the response to  
817 the measured data. The interval where the log response was considered linear to the log of the BAU  
818 mL<sup>-1</sup> was selected visually. The lm (linear model) function from the R stats package was used to obtain  
819 the parameters of the linear approximation of the curve (Figure 3a). The WHO International  
820 Reference panel (NIBSC code 20/268), which contains pooled plasma samples that are Negative (code  
821 20/142), Low (code 20/140), Low S High N (code 20/144), Mid (code 20/148), and High (code 20/150),  
822 was measured at different concentrations. Estimated BAU mL<sup>-1</sup> values were obtained from the above  
823 linear approximation using only sample dilutions that were within this linear range, and further  
824 adjusted by accounting for the dilution factor. To convert from relative ratios (RRs) to BAU mL<sup>-1</sup> for  
825 plasma or serum samples where only the reference curve was included in the same test, (Figure 3d), a  
826 conversion formula can be applied:

827

$$828 \log_2(\text{sample BAU mL}^{-1} \text{ at dilution fold } d) = (\log_2(\text{sample RR}) - a)/b + \log_2(d)$$

829

830 where a and b represent the y-intercept and slope of the linear interval of the IS curve  
831 (Supplementary table 4).

832

833 Calibration to the WHO standard for snELISA: The WHO IS and the WHO International Reference  
834 Panel were analyzed by snELISA at the indicated dilutions to convert values to International Units (IU  
835 mL<sup>-1</sup>). The same approach was applied as for the antibody detection ELISA except we used the sample  
836 relative ratio (RR) instead of the log<sub>2</sub> of the sample RR because the linear range was larger. We then  
837 applied this formula:

838

$$839 \log_2(\text{sample IU mL}^{-1} \text{ at dilution fold } d) = (\text{sample RR} - a)/b + \log_2(d)$$

840

841 where a and b represent the y-intercept and slope of the linear interval of the IS curve respectively  
842 and d is the dilution factor of the sample. For RBD as antigen, a = 1.58 and b = -0.16.

843

#### 844 **Data analysis: Ottawa**

845 For consistency in data processing, a constant plate layout was established, containing all controls and  
846 standard curves in quadruplicate (Supplementary figure 11a). Luminescence values obtained from the  
847 isotype- and antigen-specific standard curve were modeled using a four-parameter log-logistic  
848 function to identify the inflection point (Supplementary figure 11b). Blank-subtracted luminescence  
849 values were scaled in relation to the curve to allow data normalization for subsequent processing.  
850 Using a 3% false discovery rate (FDR) calculated using a density distribution from a screen of adult and  
851 pediatric pre-pandemic samples, a threshold was established for each isotype-antigen combination.  
852 Signal to threshold (also known as signal-to-cutoff, S/CO) ratios specific to each isotype-antigen  
853 combination were then calculated and sample positivity was determined (Supplementary figure 11c–

854 d). For example, for IgG, both spike and N antigens were considered. If respective antigens were  
855 detected over the established threshold ( $S/CO \geq 1$ ), a positive call was made. All analyses were  
856 performed in R. Density distributions were determined using the default density function with default  
857 parameters. Standard curve processing was performed using the LL.4 four-parameter log-logistic self-  
858 starter function from the drc package<sup>50</sup>, also with default parameters. Plots were generated using the  
859 ggplot2 and reshape2 packages.

860  
861 Using NML panel 4, containing known positive and negative DBS samples, the optimal FDR threshold  
862 value for SARS-CoV-2 IgG-positive calls was determined by testing FDRs of 1–100% and calculating the  
863 number of true positive (TP), false positive (FP), true negative (TN), and false negative (FN) samples.  
864 Maximum accuracy occurred at an FDR of 3% (Supplementary figure 11e). ROC curves and associated  
865 area under the curve measurements were generated in R using the pROC package with default  
866 parameters (Table 2, Supplementary figure 11f–h).

867  
868 To convert luminescence values into BAU  $\text{mL}^{-1}$ , the WHO IS was titrated for spike, RBD, and N  
869 (Supplementary figure 9). Scaled luminescence was calculated, as above, and response curves were  
870 modelled using the LL.4 four-parameter log-logistic self-starter function from the drc package with  
871 default parameters. The interval where the scaled luminescence response curves were considered  
872 linear to BAU was selected visually. Calibration of the three antigens was performed using the NIBSC  
873 20/268 reference panel. The following formula was used to convert scaled luminescence values to  
874 BAU  $\text{mL}^{-1}$ :

875  
876 
$$\text{BAU mL}^{-1} = e^{((\ln(((\text{Upper-Lower})/(\text{Scaled Luminescence-Lower})) - 1))/\text{Slope} + \ln(\text{EC50}))} * \text{dilution factor}$$

877  
878 For snELISA, the WHO IS was titrated and ACE2-spike binding inhibition was reported as a function of  
879 IUs. Blank adjusted luminescence values were converted to inhibition of ACE2-spike binding; maximal  
880 signal (i.e. 0% inhibition) was measured in absence of convalescent plasma (1% w/v skim milk powder  
881 in PBST). The normalized data was fitted using the LL.4 four-parameter log-logistic self-starter  
882 function from the drc package with default parameters in R to correlate binding inhibition to IUs. The  
883 following formula was used to convert binding inhibition % to IU  $\text{mL}^{-1}$ :

884  
885 
$$\text{IU mL}^{-1} = e^{((\ln(((\text{Upper-Lower})/(\% \text{inhibition-Lower})) - 1))/\text{Slope} + \ln(\text{EC50}))} * \text{dilution factor}$$

### 886 887 **Reagent access**

888 The reagents produced by the NRC and qualified as reference materials (spike [SMT1-1], N [NCAP-1]  
889 and hACE2-BAP) are available through the Metrology Research Centre Virtual Store ([Virtual Store -  
890 National Research Council Canada: Products in Category Proteins \(nrc-cnrc.gc.ca\)](https://www.nrc-cnrc.gc.ca/virtual-store)). A limited panel of  
891 matched plasma and DBS is available upon request

### 892 893 **Code availability**

894 Code is available upon request.

### 895 896 **ACKNOWLEDGMENTS**

897 We thank Alex Pelletier, Denis L'Abbé, Mélanie Duchesne, Simon Lord-Dufour, Manon Ouimet, Brian  
898 Cass, Louis Bisson, Alina Burlacu, Jean-Sébastien Maltais, Sergio Alpuche-Lazcano and other members  
899 of the NRC-HHT Mammalian Cell Expression Section for their contribution to the cloning, expression

900 and purification of the various recombinant proteins used in this study. The contribution of Joline  
901 Cormier to recombinant protein sample management is greatly appreciated. We are grateful to Joe  
902 Schrag, Roger Maurice, and Mathieu Coutu from NRC-HHT (Montreal) for SEC-UPLC and SEC-HPLC  
903 analyses. We thank Jamshid Tanha and Martin Rossotti from NRC-HHT (Ottawa) for providing  
904 NRCov2-04-hFc1X7 and NRCov2-20-hFc1X7 antibodies. We thank Frank Sicheri and Derek Ceccarelli  
905 (LTRI) for contributing bacterially expressed N and James Rini (University of Toronto) for contributing  
906 RBD and biotinylated ACE2 protein to compare with the reagents described here. We also thank  
907 Lauren Caldwell for preprocessing some of the data generated from automated ELISAs. We thank  
908 Bruce Mazer, Mel Krajdén and members of the COVID-19 Immunity Task Force (CITF) for coordinating  
909 immune response studies across the country and for supporting assay development and  
910 implementation. This is NRC's publication #NRC-HHT\_53561A. We acknowledge support from Ontario  
911 Together and funding from the Canadian Institutes of Health Research (CIHR; #VR1-172711, GA1-  
912 177703 and #439999) and the COVID-19 Immunity Task Force (CITF). We also acknowledge financial  
913 support from the NRC's Pandemic Response Challenge Program. Funding for initial assay development  
914 in the Gingras lab was provided through generous donations from the Royal Bank of Canada and the  
915 Krembil Foundation to the Sinai Health System Foundation. The robotics equipment used is housed in  
916 the Network Biology Collaborative Centre at the LTRI, a facility supported by the Canada Foundation  
917 for Innovation, the Ontario Government, and Genome Canada and Ontario Genomics (OGI-139).  
918 Assay development in the Langlois lab and the purchase of robotic equipment was supported by a  
919 grant from the CIHR (#VR2-172722 and VS2 - 175569) and supplemental funding from the CITF. Kento  
920 T Abe was a recipient of an Ontario Graduate Scholarship and is supported by a CIHR CGS-D  
921 studentship. Yannick Galipeau is supported by a CIHR CGS-M studentship. Mariam Maltseva holds a  
922 Queen Elizabeth II Graduate Scholarship in Science and Technology (QEII-GSST). Anne-Claude Gingras  
923 is the Canada Research Chair in Functional Proteomics, and Marc-André Langlois, Anne-Claude  
924 Gingras, Jeffrey Wrana, and Samira Mubareka are members of CoVaRR-Net, the CIHR Coronavirus  
925 Variants Rapid Response Network.

926

927 **Competing interests:** The authors declare no competing interests for this manuscript.

928

929 **Contributors:** Karen Colwill, Anne-Claude Gingras, Marc-André Langlois, and Yves Durocher conceived  
930 the study. Karen Colwill, Anne-Claude Gingras, Marc-André Langlois, Matthew Stuiblé, Christian  
931 Gervais, Yannick Galipeau, Corey Arnold, and Yves Durocher wrote the paper. Yves Durocher,  
932 Matthew Stuiblé and Christian Gervais designed, performed, and validated reagent purification  
933 procedures. Linda Bennett, Kevin Yau, Angel X Li, Aimee Paterson, Michelle A Hladunewich, Pamela J  
934 Goodwin, Samira Mubareka, Allison J McGeer and Steven J Drews contributed essential patient  
935 samples. Bhavisha Rathod was responsible for sample intake at the Toronto site. François Cholette,  
936 Christine Mesa prepared and helped evaluate DBS panels and John Kim supervised the DBS panel  
937 evaluation. Yannick Galipeau, Corey Arnold, Bhavisha Rathod, Jenny H Wang, Mariam Maltseva,  
938 Mariam Iskilova, and Mahya Fazel-Zarandi performed serology experiments. Karen Colwill, Miriam  
939 Barrios-Rodiles, Kento T Abe, Martin Pelchat, Lynda Rocheleau, Yannick Galipeau and Adrian  
940 Pasculescu performed data analysis. Martin Pelchat and Adrian Pasculescu performed statistical  
941 modelling. Karen Colwill, Kento T Abe, Adrian Pasculescu, Yannick Galipeau, Mariam Maltseva, Lynda  
942 Rocheleau, Matthew Stuiblé and Martin Pelchat generated figures for the paper. Miriam Barrios-  
943 Rodiles and Jeffrey L Wrana provided oversight of the Toronto screening facility.

944 All the authors gave final approval of the version to be published and agreed to be accountable for all  
945 aspects of the work. Marc-André Langlois, Anne-Claude Gingras, and Yves Durocher are co-senior  
946 corresponding authors.

947  
948 **Data Sharing:** Raw and normalized values from the automated assays are provided in Supplementary  
949 table 5. R scripts used to analyze the data are available upon request.

950

951

952

## 953 References

- 954 1. Johns Hopkins University COVID-19 Dashboard. [cited February 25 2021]. Available from:  
955 <https://coronavirus.jhu.edu/map.html>.
- 956 2. Few Canadians had antibodies against SARS-CoV-2 in early 2021 - Statistics Canada. [updated  
957 July 6 2021; cited February 25 2022]. Available from: [https://www150.statcan.gc.ca/n1/daily-](https://www150.statcan.gc.ca/n1/daily-quotidien/210706/dq210706a-eng.htm)  
958 [quotidien/210706/dq210706a-eng.htm](https://www150.statcan.gc.ca/n1/daily-quotidien/210706/dq210706a-eng.htm).
- 959 3. Serotracker. [updated February 22 2022; cited February 25 2022]. Available from:  
960 <https://serotracker.com/en/Explore>.
- 961 4. Chung H, He S, Nasreen S, *et al*. Effectiveness of BNT162b2 and mRNA-1273 covid-19 vaccines  
962 against symptomatic SARS-CoV-2 infection and severe covid-19 outcomes in Ontario, Canada:  
963 test negative design study. *BMJ* 2021; **374**: n1943.
- 964 5. Health Infobase Canada -COVID-19 Vaccination Coverage. [updated February 18 2022; cited  
965 February 25 2022]. Available from: [https://health-infobase.canada.ca/covid-19/vaccination-](https://health-infobase.canada.ca/covid-19/vaccination-coverage/)  
966 [coverage/](https://health-infobase.canada.ca/covid-19/vaccination-coverage/).
- 967 6. Van Caesele P, Canadian Public Health Laboratory N, Bailey D, *et al*. SARS-CoV-2 (COVID-19)  
968 serology: implications for clinical practice, laboratory medicine and public health. *Cmaj* 2020;  
969 **192**: E973-E979.
- 970 7. Favresse J, Eucher C, Elsen M, *et al*. Persistence of Anti-SARS-CoV-2 Antibodies Depends on the  
971 Analytical Kit: A Report for Up to 10 Months after Infection. *Microorganisms* 2021; **9**.
- 972 8. Isho B, Abe KT, Zuo M, *et al*. Persistence of serum and saliva antibody responses to SARS-CoV-  
973 2 spike antigens in COVID-19 patients. *Science immunology* 2020; **5**.
- 974 9. Sherina N, Piralla A, Du L, *et al*. Persistence of SARS-CoV-2-specific B and T cell responses in  
975 convalescent COVID-19 patients 6-8 months after the infection. *Med (N Y)* 2021; **2**: 281-295  
976 e284.
- 977 10. Dan JM, Mateus J, Kato Y, *et al*. Immunological memory to SARS-CoV-2 assessed for up to 8  
978 months after infection. *Science (New York, NY)* 2021; **371**.
- 979 11. Gallais F, Gantner P, Bruel T, *et al*. Evolution of antibody responses up to 13 months after  
980 SARS-CoV-2 infection and risk of reinfection. *EBioMedicine* 2021; **71**: 103561.
- 981 12. Feng C, Shi J, Fan Q, *et al*. Protective humoral and cellular immune responses to SARS-CoV-2  
982 persist up to 1 year after recovery. *Nat Commun* 2021; **12**: 4984.
- 983 13. Abe KT, Li Z, Samson R, *et al*. A simple protein-based surrogate neutralization assay for SARS-  
984 CoV-2. *JCI Insight* 2020; **5**.
- 985 14. Mattiuzo G, Bentley E, Hassall M, *et al*. Establishment of the WHO International Standard and  
986 Reference Panel for anti-SARS-CoV-2 antibody. WHO Expert Committee on Biological  
987 Standardization. WHO/BS/2020.2403. In: Organization WH, editor. 2020.

- 988 15. Stuible M, Gervais C, Lord-Dufour S, *et al.* Rapid, high-yield production of full-length SARS-CoV-  
989 2 spike ectodomain by transient gene expression in CHO cells. *J Biotechnol* 2021; **326**: 21-27.
- 990 16. Ye Q, West AMV, Silletti S, Corbett KD. Architecture and self-assembly of the SARS-CoV-2  
991 nucleocapsid protein. *Protein Sci* 2020; **29**: 1890-1901.
- 992 17. Wrapp D, De Vlioger D, Corbett KS, *et al.* Structural Basis for Potent Neutralization of  
993 Betacoronaviruses by Single-Domain Camelid Antibodies. *Cell* 2020; **181**: 1436-1441.
- 994 18. Morley GL, Taylor S, Jossi S, *et al.* Sensitive Detection of SARS-CoV-2-Specific Antibodies in  
995 Dried Blood Spot Samples. *Emerg Infect Dis* 2020; **26**: 2970-2973.
- 996 19. Biosafety advisory: SARS-CoV-2 (Severe acute respiratory syndrome-related coronavirus 2) -  
997 Government of Canada. [updated November 23 2021; cited February 25 2022]. Available from:  
998 [https://www.canada.ca/en/public-health/services/laboratory-biosafety-biosecurity/biosafety-](https://www.canada.ca/en/public-health/services/laboratory-biosafety-biosecurity/biosafety-directives-advisories-notifications/novel-coronavirus-january-27.html)  
999 [directives-advisories-notifications/novel-coronavirus-january-27.html](https://www.canada.ca/en/public-health/services/laboratory-biosafety-biosecurity/biosafety-directives-advisories-notifications/novel-coronavirus-january-27.html).
- 1000 20. Galipeau Y, Siragam V, Laroche G, *et al.* Relative Ratios of Human Seasonal Coronavirus  
1001 Antibodies Predict the Efficiency of Cross-Neutralization of SARS-CoV-2 Spike Binding to ACE2.  
1002 *EBioMedicine* 2021; **74**: 103700.
- 1003 21. Yau K, Abe KT, Naimark D, *et al.* Evaluation of the SARS-CoV-2 Antibody Response to the  
1004 BNT162b2 Vaccine in Patients Undergoing Hemodialysis. *JAMA Netw Open* 2021; **4**: e2123622.
- 1005 22. Feng S, Phillips DJ, White T, *et al.* Correlates of protection against symptomatic and  
1006 asymptomatic SARS-CoV-2 infection. *Nature medicine* 2021; **27**: 2032-2040.
- 1007 23. Approved COVID-19 Vaccines - Government of Canada. [updated February 24 2022; cited  
1008 February 25 2022]. Available from: [https://www.canada.ca/en/health-canada/services/drugs-](https://www.canada.ca/en/health-canada/services/drugs-health-products/covid19-industry/drugs-vaccines-treatments/vaccines.html)  
1009 [health-products/covid19-industry/drugs-vaccines-treatments/vaccines.html](https://www.canada.ca/en/health-canada/services/drugs-health-products/covid19-industry/drugs-vaccines-treatments/vaccines.html).
- 1010 24. Approved COVID-19 Vaccines - US Food and Drug Administration. [updated February 11 2022;  
1011 cited February 25 2022]. Available from: [https://www.fda.gov/emergency-preparedness-and-](https://www.fda.gov/emergency-preparedness-and-response/coronavirus-disease-2019-covid-19/covid-19-vaccines)  
1012 [response/coronavirus-disease-2019-covid-19/covid-19-vaccines](https://www.fda.gov/emergency-preparedness-and-response/coronavirus-disease-2019-covid-19/covid-19-vaccines).
- 1013 25. COVID-19 approved vaccines - European Medicines Agency. [cited February 25 2022].  
1014 Available from: [https://www.ema.europa.eu/en/human-regulatory/overview/public-health-](https://www.ema.europa.eu/en/human-regulatory/overview/public-health-threats/coronavirus-disease-covid-19/treatments-vaccines/covid-19-vaccines)  
1015 [threats/coronavirus-disease-covid-19/treatments-vaccines/covid-19-vaccines](https://www.ema.europa.eu/en/human-regulatory/overview/public-health-threats/coronavirus-disease-covid-19/treatments-vaccines/covid-19-vaccines).
- 1016 26. Duarte N, Yanes-Lane M, Arora RK, *et al.* Adapting Serosurveys for the SARS-CoV-2 Vaccine  
1017 Era. *Open Forum Infect Dis* 2022; **9**: ofab632.
- 1018 27. Lv H, Wu NC, Tsang OT, *et al.* Cross-reactive Antibody Response between SARS-CoV-2 and  
1019 SARS-CoV Infections. *Cell Rep* 2020; **31**: 107725.
- 1020 28. Ou X, Liu Y, Lei X, *et al.* Characterization of spike glycoprotein of SARS-CoV-2 on virus entry and  
1021 its immune cross-reactivity with SARS-CoV. *Nat Commun* 2020; **11**: 1620.
- 1022 29. Dobano C, Santano R, Jimenez A, *et al.* Immunogenicity and crossreactivity of antibodies to the  
1023 nucleocapsid protein of SARS-CoV-2: utility and limitations in seroprevalence and immunity  
1024 studies. *Transl Res* 2021; **232**: 60-74.
- 1025 30. Rogers TF, Zhao F, Huang D, *et al.* Isolation of potent SARS-CoV-2 neutralizing antibodies and  
1026 protection from disease in a small animal model. *Science (New York, NY)* 2020; **369**: 956-963.
- 1027 31. Premkumar L, Segovia-Chumbez B, Jadi R, *et al.* The receptor binding domain of the viral spike  
1028 protein is an immunodominant and highly specific target of antibodies in SARS-CoV-2 patients.  
1029 *Science immunology* 2020; **5**.
- 1030 32. Science Brief: Omicron (B.1.1.529) Variant. [updated December 2 2021; cited February 25  
1031 2022]. Available from: [https://www.cdc.gov/coronavirus/2019-ncov/science/science-](https://www.cdc.gov/coronavirus/2019-ncov/science/science-briefs/scientific-brief-omicron-variant.html)  
1032 [briefs/scientific-brief-omicron-variant.html](https://www.cdc.gov/coronavirus/2019-ncov/science/science-briefs/scientific-brief-omicron-variant.html).

- 1033 33. Tuite AR, Fisman D, Abe KT, *et al.* Estimating SARS-CoV-2 Seroprevalence in Canadian Blood  
1034 Donors, April 2020 to March 2021: Improving Accuracy with Multiple Assays. *Microbiol Spectr*  
1035 2022; **10**: e0256321.
- 1036 34. Saeed S, O'Brien SF, Abe K, *et al.* Severe acute respiratory syndrome coronavirus 2 (SARS-CoV-  
1037 2) seroprevalence: Navigating the absence of a gold standard. *PloS one* 2021; **16**: e0257743.
- 1038 35. Tang X, Sharma A, Pasic M, *et al.* Assessment of SARS-CoV-2 Seropositivity During the First and  
1039 Second Viral Waves in 2020 and 2021 Among Canadian Adults. *JAMA Netw Open* 2022; **5**:  
1040 e2146798.
- 1041 36. CanPath National Study. [updated June 23 2021; cited February 25 2022]. Available from:  
1042 [https://canpath.ca/2021/06/early-results-from-canpaths-national-study-confirm-antibody-](https://canpath.ca/2021/06/early-results-from-canpaths-national-study-confirm-antibody-levels-are-stronger-after-receiving-two-doses-of-covid-19-vaccine)  
1043 [levels-are-stronger-after-receiving-two-doses-of-covid-19-vaccine.](https://canpath.ca/2021/06/early-results-from-canpaths-national-study-confirm-antibody-levels-are-stronger-after-receiving-two-doses-of-covid-19-vaccine)
- 1044 37. Walmsley S, Szadkowski L, Wouters B, *et al.* Safety and Efficacy of Preventative COVID  
1045 Vaccines: The StopCoV Study. *medRxiv* 2022: 2022.2002.2009.22270734.
- 1046 38. Dayam RM, Law JC, Goetgebuer RL, *et al.* Antibody and T cell responses to SARS-CoV-2 mRNA  
1047 vaccines during maintenance therapy for immune-mediated inflammatory diseases. *medRxiv*  
1048 2022: 2022.2001.2026.22269856.
- 1049 39. Yau K, Chan CT, Abe KT, *et al.* Differences in mRNA-1273 (Moderna) and BNT162b2 (Pfizer-  
1050 BioNTech) SARS-CoV-2 vaccine immunogenicity among patients undergoing dialysis. *Cmaj*  
1051 2022.
- 1052 40. Abe KT, Hu Q, Mozafarihashjin M, *et al.* Neutralizing antibody responses to SARS-CoV-2  
1053 variants in vaccinated Ontario long-term care home residents and workers. *medRxiv Preprint*  
1054 2021: 2021.2008.2006.21261721.
- 1055 41. Vinh DC, Gouin J-P, Cruz-Santiago D, *et al.* Real-world serologic responses to Extended-interval  
1056 and Heterologous COVID-19 mRNA vaccination in Frail Elderly - Interim report from a  
1057 prospective observational cohort study. *medRxiv Preprint* 2021: 2021.2009.2016.21263704.
- 1058 42. CITF Funded Projects. [cited February 24 2022]. Available from:  
1059 [https://www.covid19immunitytaskforce.ca/task-force-](https://www.covid19immunitytaskforce.ca/task-force-research/#:~:text=Our%20Funded%20Research,Cutting%20Themes%2C%20and%20Immunity%20Modelling)  
1060 [research/#:~:text=Our%20Funded%20Research,Cutting%20Themes%2C%20and%20Immunity](https://www.covid19immunitytaskforce.ca/task-force-research/#:~:text=Our%20Funded%20Research,Cutting%20Themes%2C%20and%20Immunity%20Modelling)  
1061 [%20Modelling.](https://www.covid19immunitytaskforce.ca/task-force-research/#:~:text=Our%20Funded%20Research,Cutting%20Themes%2C%20and%20Immunity%20Modelling)
- 1062 43. Shi C, Shin YO, Hanson J, Cass B, Loewen MC, Durocher Y. Purification and characterization of a  
1063 recombinant G-protein-coupled receptor, *Saccharomyces cerevisiae* Ste2p, transiently  
1064 expressed in HEK293 EBNA1 cells. *Biochemistry* 2005; **44**: 15705-15714.
- 1065 44. Dorion-Thibaudeau J, St-Laurent G, Raymond C, De Crescenzo G, Durocher Y. Biotinylation of  
1066 the Fcγ receptor ectodomains by mammalian cell co-transfection: application to the  
1067 development of a surface plasmon resonance-based assay. *J Mol Recognit* 2016; **29**: 60-69.
- 1068 45. Darnell ME, Taylor DR. Evaluation of inactivation methods for severe acute respiratory  
1069 syndrome coronavirus in noncellular blood products. *Transfusion* 2006; **46**: 1770-1777.
- 1070 46. Cholette F, Mesa C, Harris A, *et al.* Dried blood spot specimens for SARS-CoV-2 antibody  
1071 testing: A multi-site, multi-assay comparison. *PloS one* 2021; **16**: e0261003.
- 1072 47. Amanat F, Stadlbauer D, Strohmeier S, *et al.* A serological assay to detect SARS-CoV-2  
1073 seroconversion in humans. *Nature medicine* 2020; **26**: 1033-1036.
- 1074 48. Amanat F, Stadlbauer D, Strohmeier S, *et al.* A serological assay to detect SARS-CoV-2  
1075 seroconversion in humans. *Nature medicine* 2020.
- 1076 49. Robin X, Turck N, Hainard A, *et al.* pROC: an open-source package for R and S+ to analyze and  
1077 compare ROC curves. *BMC bioinformatics* 2011; **12**: 77.



1078 50. Ritz C, Baty F, Streibig JC, Gerhard D. Dose-Response Analysis Using R. *PloS one* 2015; **10**:  
1079 e0146021.

1080

## 1081 **Figure Legends**

1082

1083 **Figure 1.** High-quality reagents for SARS-CoV-2 serology. **(a)** Reagents comprising the protein toolbox  
1084 (left panel) are used in high-throughput plate-based ELISAs for antibody detection and surrogate  
1085 neutralization (right panel). **(b)** The reagents were analyzed on Coomassie-stained polyacrylamide gels  
1086 under reducing conditions to assess their purity. Molecular weight markers (kDa) are shown to the  
1087 left of the gels.

1088

1089 **Figure 2.** Development of high-throughput ELISAs for plasma or serum. **(a)** Known negative (pre-  
1090 COVID-19) and positive (confirmed convalescent) samples (0.0625  $\mu\text{L}/\text{well}$ ) were tested in an  
1091 automated antibody detection ELISA in two separate replicates 7 weeks apart. Spearman correlations  
1092 are noted. **(b)** Density distributions of negative samples were plotted for each antigen. The black lines  
1093 represent the mean of the negative distribution (dotted) and three SDs from the mean (solid; the  
1094 relative ratio is indicated). The blue line represents the thresholds established by ROC analysis. **(c)**  
1095 Comparison of the antigens with a set of known negative and positive samples at 0.0625  $\mu\text{L}/\text{well}$ .  
1096 Spearman correlations are shown. For both (a) and (c), dashed lines represent the thresholds as  
1097 defined by the 3-SD negative distribution shown in (b) and listed in Table 1.

1098

1099 **Figure 3.** Conversion of Ottawa and Toronto ELISA data to WHO BAUs and comparison to the WHO  
1100 Reference Panel 20/268. **(a)** The 20/268 reference panel at the indicated dilutions (arrows) was fitted  
1101 onto a dose-response curve of the IS with the measured values expressed as relative ratios (Toronto).  
1102 A 1:160 dilution (0.0625  $\mu\text{L}/\text{well}$ ) of sample was used except when it was out of the linear range of the  
1103 fitted line in which case the 1:2560 dilution (0.0039  $\mu\text{L}/\text{well}$ ) was used. **(b)** IgG levels in the five  
1104 samples in the 20/268 reference panel are represented for spike, its RBD, and N ( $n = 12$ , 4 replicates  
1105 at 1:500, 1:1,000, 1:2,500 dilutions). **(c)** Box plots for Ottawa (orange) show the median of the 12  
1106 samples from B. Box plots for Toronto (blue) show the median of individual measurements ( $n = 4$ ) for  
1107 the selected dilution (1:2560 (0.0039  $\mu\text{L}/\text{well}$ ) for Mid and High for spike and N, High for RBD, the rest  
1108 were at 1:160 (0.0625  $\mu\text{L}/\text{well}$ )). The WHO bar graph shows the geometric mean from the WHO study  
1109 and the lines with half arrows represent a 0.5–2-fold range from the geometric mean. **(d)** Reference  
1110 curves (VHH72-Fc for spike/RBD, anti-N for N) were plotted for each antigen either from the same  
1111 tests in which the IS was analyzed or from 25 different tests over 3 months (shown as faded black  
1112 lines with a thicker median line in black). The blue dashed lines represent the limits of the linear  
1113 intervals for the curves and the pink arrows represent the BAU  $\text{mL}^{-1}$  at those points. As the reference  
1114 curves are parallel to the IS within the linear interval, a conversion factor can be applied to convert  
1115 relative ratios to international BAU  $\text{mL}^{-1}$  units (Supplementary table 4). For illustrations purposes to  
1116 show IS and reference curves in the same panel, the X-axis is BAU  $\text{mL}^{-1}$  for IS and  $\mu\text{g mL}^{-1} * 100$  for the  
1117 reference curves.

1118

1119 **Figure 4.** Dose response curves or single-point snELISA and conversion to International Units using the  
1120 Who International Standard. **(a)** Correlation of spike to RBD as snELISA antigens is shown for 11  
1121 samples in a 10-point dilution series (individual curves are shown in Supplementary figure 13). **(b)**  
1122 Dose response curves ( $n = 4$ ) for the spike snELISA. Samples were from convalescent SARS-CoV-2

1123 individuals 3 weeks after 1 or 2 doses of Comirnaty vaccine (Pfizer) or an uninfected individual (from a  
1124 surveillance study) 3 weeks post-first dose of Comirnaty. Pooled sera were from 100 individuals with  
1125 or without prior SARS-CoV-2 infection. **(c)** Single point measurements (at 1:5 dilution) using the spike  
1126 snELISA. **(d)** Titration of the neutralizing activity of the WHO IS using snELISA. Raw luminescence  
1127 values were converted to inhibition of ACE2-Spike binding; maximal signal (i.e. 0% inhibition) was  
1128 measured in absence of convalescent plasma (PBS only). The normalized data was fitted with a four-  
1129 parameter logistic function and the 95% confidence interval (IC95) and two standard deviations (2SD)  
1130 is shown. **(e)** Box plots for the WHO reference panel 20/268 using RBD (blue, Toronto, ACE2 source:  
1131 Rini) or spike (orange, Ottawa) as antigens. For RBD,  $n = 3$  at 1:10 dilution for Low,  $n = 4$  at 1:10  
1132 dilution for Mid,  $n = 7$  at 1:40 and 1:160 for High. For spike,  $n = 12$  for High (4 replicates at 3  
1133 dilutions),  $n = 8$  for LowS HighN and Mid (4 replicates at 2 dilutions) and  $n = 4$  for Low (2 replicates at  
1134 2 dilutions). The WHO bar graph shows the geometric mean from the WHO study and the lines with  
1135 half arrows represent a 0.5–2-fold range from the geometric mean. No inhibition was seen for the  
1136 LowS HighN sample for RBD.

1137

1138 **Figure 5.** Visualization of Data from 3 Antigen testing. The results from the three antigens with known  
1139 negative and positive samples **(a)** and samples from a longitudinal study of patients on dialysis at  
1140 baseline and after their first vaccine dose **(b)**. The dashed lines represent the thresholds for spike and  
1141 N. The area with positives for both spike and N (colored in gray) is indicative of natural infection and  
1142 the area showing samples that are N-negative but spike-positive (and RBD-positive if colored) is  
1143 highlighted in green on the right panel and is indicative of vaccination.

1144

1145

1146  
1147

**Table 1.** ELISA performance statistics for plasma or serum IgG (Toronto)

|                                                     | spike      | RBD                              | N     | ≥ 2 positive antigens |
|-----------------------------------------------------|------------|----------------------------------|-------|-----------------------|
| <b>ROC analysis</b>                                 |            |                                  |       |                       |
| <b>AUC</b>                                          | 0.978      | 0.974                            | 0.964 | n/a                   |
| <b>Threshold (Cut Point)</b>                        | 0.195      | 0.073                            | 0.349 | n/a                   |
| <b>FPR</b>                                          | 0.009      | 0.009                            | 0.009 | 0.000                 |
| <b>TPR</b>                                          | 0.944      | 0.921                            | 0.811 | 0.931                 |
| <b>3 SDs from the mean of the negative controls</b> |            |                                  |       |                       |
| <b>Threshold</b>                                    | 0.190      | 0.186                            | 0.396 | n/a                   |
| <b>FPR</b>                                          | 0.011      | 0.000                            | 0.007 | 0.000                 |
| <b>TPR</b>                                          | 0.944      | 0.890                            | 0.786 | 0.912                 |
| <b>Samples used to assess performance †</b>         |            |                                  |       |                       |
| Sample cohort                                       | Replicates | Number                           | Total |                       |
| <b>Patients with COVID-19</b>                       | 1          | 211                              | 392   |                       |
|                                                     | 2          | 181                              |       |                       |
| <b>Pre-COVID-19 (negative)</b>                      | 1          | 300 for N and spike, 296 for RBD | 560   |                       |
|                                                     | 2          | 260 for N and RBD, 258 for spike |       |                       |

1148 †Negative samples were excluded from the analysis for spike and RBD if one replicate was positive.

1149  
1150

1151 **Table 2. ROC statistics for the DBS IgG ELISA (Ottawa)**

| Antigen                                                          | spike | RBD   | N     | ≥ 2 positive antigens |
|------------------------------------------------------------------|-------|-------|-------|-----------------------|
| AUC                                                              | 0.991 | 0.996 | 0.992 | N/A                   |
| Threshold (Cut Point)                                            | 1.410 | 0.868 | 1.171 | N/A                   |
| FPR                                                              | 0.02  | 0.01  | 0.06  | 0.02                  |
| TPR                                                              | 1.00  | 1.00  | 1.00  | 0.98                  |
| <b>Number of samples used to generate ROC curves<sup>†</sup></b> |       |       |       |                       |
| Antigen                                                          | spike | RBD   | N     | ≥ 2 positive antigens |
| <b>Patients with COVID-19</b>                                    | 97    | 97    | 97    | 97                    |
| Number excluded                                                  | 2     | 2     | 2     | 2                     |
| Total analyzed                                                   | 95    | 95    | 95    | 95                    |
| <b>Pre-COVID-19 (negative)</b>                                   | 90    | 90    | 90    | 90                    |
| Number excluded                                                  | 0     | 0     | 0     | 0                     |
| Total analyzed                                                   | 90    | 90    | 90    | 90                    |

1152 <sup>†</sup>NML panel 4. Each sample was analyzed once, and thresholds were defined at 3% FDR as described  
 1153 in Supplementary figure 11. Two positive samples were excluded as they were early on in infection.  
 1154  
 1155

1156 **Table 3.** ROC statistics for the DBS IgG ELISA (Toronto)

| Antigen                                                          | spike | RBD   | N     | ≥ 2 positive antigens |
|------------------------------------------------------------------|-------|-------|-------|-----------------------|
| <b>AUC</b>                                                       | 0.99  | 0.99  | 0.99  | N/A                   |
| <b>Threshold (Cut point)</b>                                     | 0.482 | 0.324 | 0.642 | N/A                   |
| <b>FPR</b>                                                       | 0.01  | 0.01  | 0.01  | 0.00                  |
| <b>TPR</b>                                                       | 0.98  | 0.98  | 0.92  | 0.98                  |
| <b>Number of samples used to generate ROC curves<sup>†</sup></b> |       |       |       |                       |
| Antigen                                                          | spike | RBD   | N     | ≥ 2 positive antigens |
| <b>Patients with COVID-19</b>                                    | 97    | 97    | 97    | 97                    |
| Number excluded                                                  | 0     | 0     | 0     | 0                     |
| Total analyzed                                                   | 97    | 97    | 97    | 97                    |
| <b>Pre-COVID-19 (negative)</b>                                   | 90    | 90    | 90    | 90                    |
| Number excluded                                                  | 3     | 1     | 2     | 4                     |
| Total analyzed                                                   | 87    | 89    | 88    | 86                    |

1157 <sup>†</sup>NML panel 4. Each sample was analyzed in duplicate (the unique numbers of samples are shown).  
 1158 Replicates were treated as separate samples in the ROC analysis. Negative samples were excluded  
 1159 from the analysis if the replicates were > 4 SDs from the mean.

1160

## 1161 **Supplementary figures**

1162

1163 Supplementary figure 1 – Chromatogram traces for the purified ELISA antigens and detection  
1164 reagents.

1165 Supplementary figure 2 – Purification of recombinant anti-spike antibodies.

1166 Supplementary figure 3 – Titration curves of 32 serum samples from CBS using automated ELISAs to  
1167 detect (a) spike, (b) RBD 331–521, and (c) N antibodies.

1168 Supplementary figure 4 – Performance of the IgG chemiluminescent ELISAs with plasma and serum.

1169 Supplementary figure 5 – Comparison between o-Phenylenediamine dihydrochloride (OPD) and  
1170 3,3',5,5'-tetramethylbenzidine (TMB) as colorimetric substrates for the  
1171 manual 96-well plate ELISA.

1172 Supplementary figure 6 – Comparison of IgG-HRP secondary antibody performance (a) Analysis of NRC  
1173 IgG-HRP secondary (detection) antibodies.

1174 Supplementary figure 7 – Elution and secondary antibody optimizations for IgG ELISAs using DBSs.

1175 Supplementary figure 8 – IgA and IgM ELISAs.

1176 Supplementary figure 9 – Conversion of serology data to WHO BAUs and validation of SARS-CoV-2  
1177 IgG profiling performed on the uOttawa automated serology platform.

1178 Supplementary figure 10 – DBS optimization.

1179 Supplementary figure 11 – Processing and validation of the Ottawa automated serology platform.

1180 Supplementary figure 12 – ROC curve for panel 4 DBS IgG analysis.

1181 Supplementary figure 13 – Optimization and testing of NRC reagents for snELISA.

1182 Supplementary figure 14 – Optimization of the snELISA for the automated platform.

1183 Supplementary figure 15 – Optimized snELISA for the automated platform.

1184 Supplementary figure 16 – Optimization of the NRC reagents.

1185 Supplementary figure 17 – Optimization of IgG#5-HRP and recombinant antibodies for  
1186 chemiluminescent assays

1187

1188

## 1189 **Supplementary Tables**

1190

1191 Supplementary table 1 – Reagent information.

1192 Supplementary table 2 – Comparison of manual and automated ELISAs.

1193 Supplementary table 3 – ELISA performance statistics for plasma or serum IgA and IgM (Toronto).

1194 Supplementary table 4 – Conversion of relative ratios to international units (BAU mL<sup>-1</sup>) for plasma or  
1195 serum.

1196 Supplementary table 5 – Raw data from automated experiments.

1197

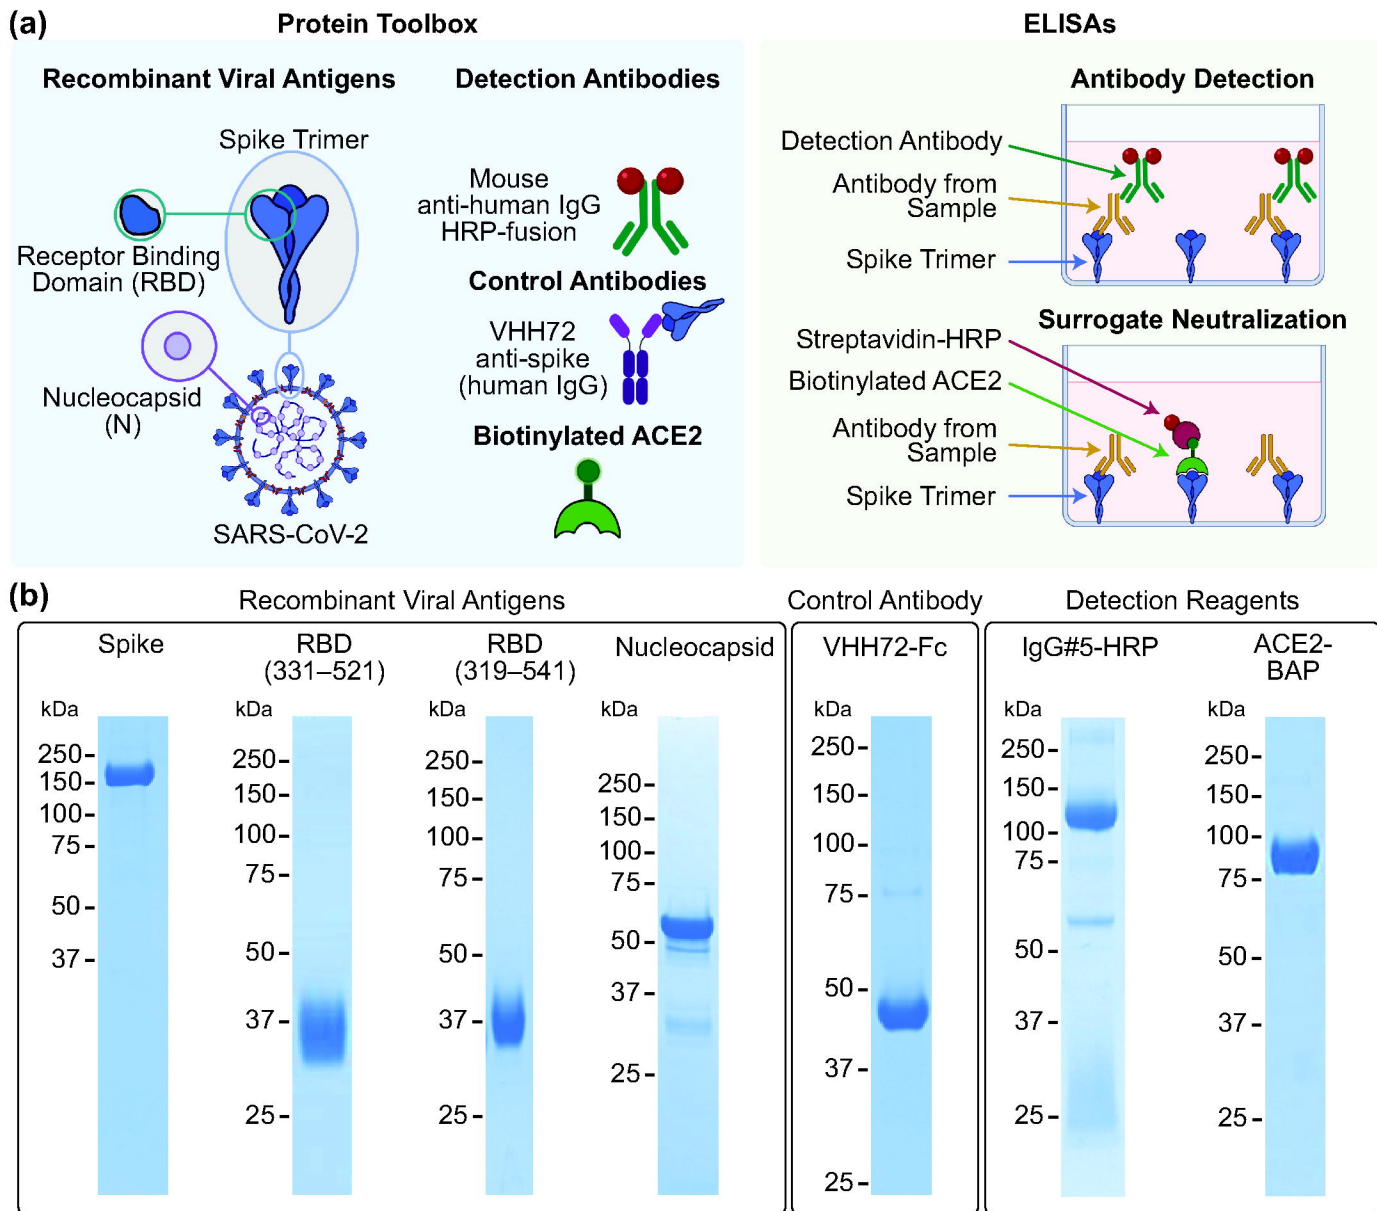

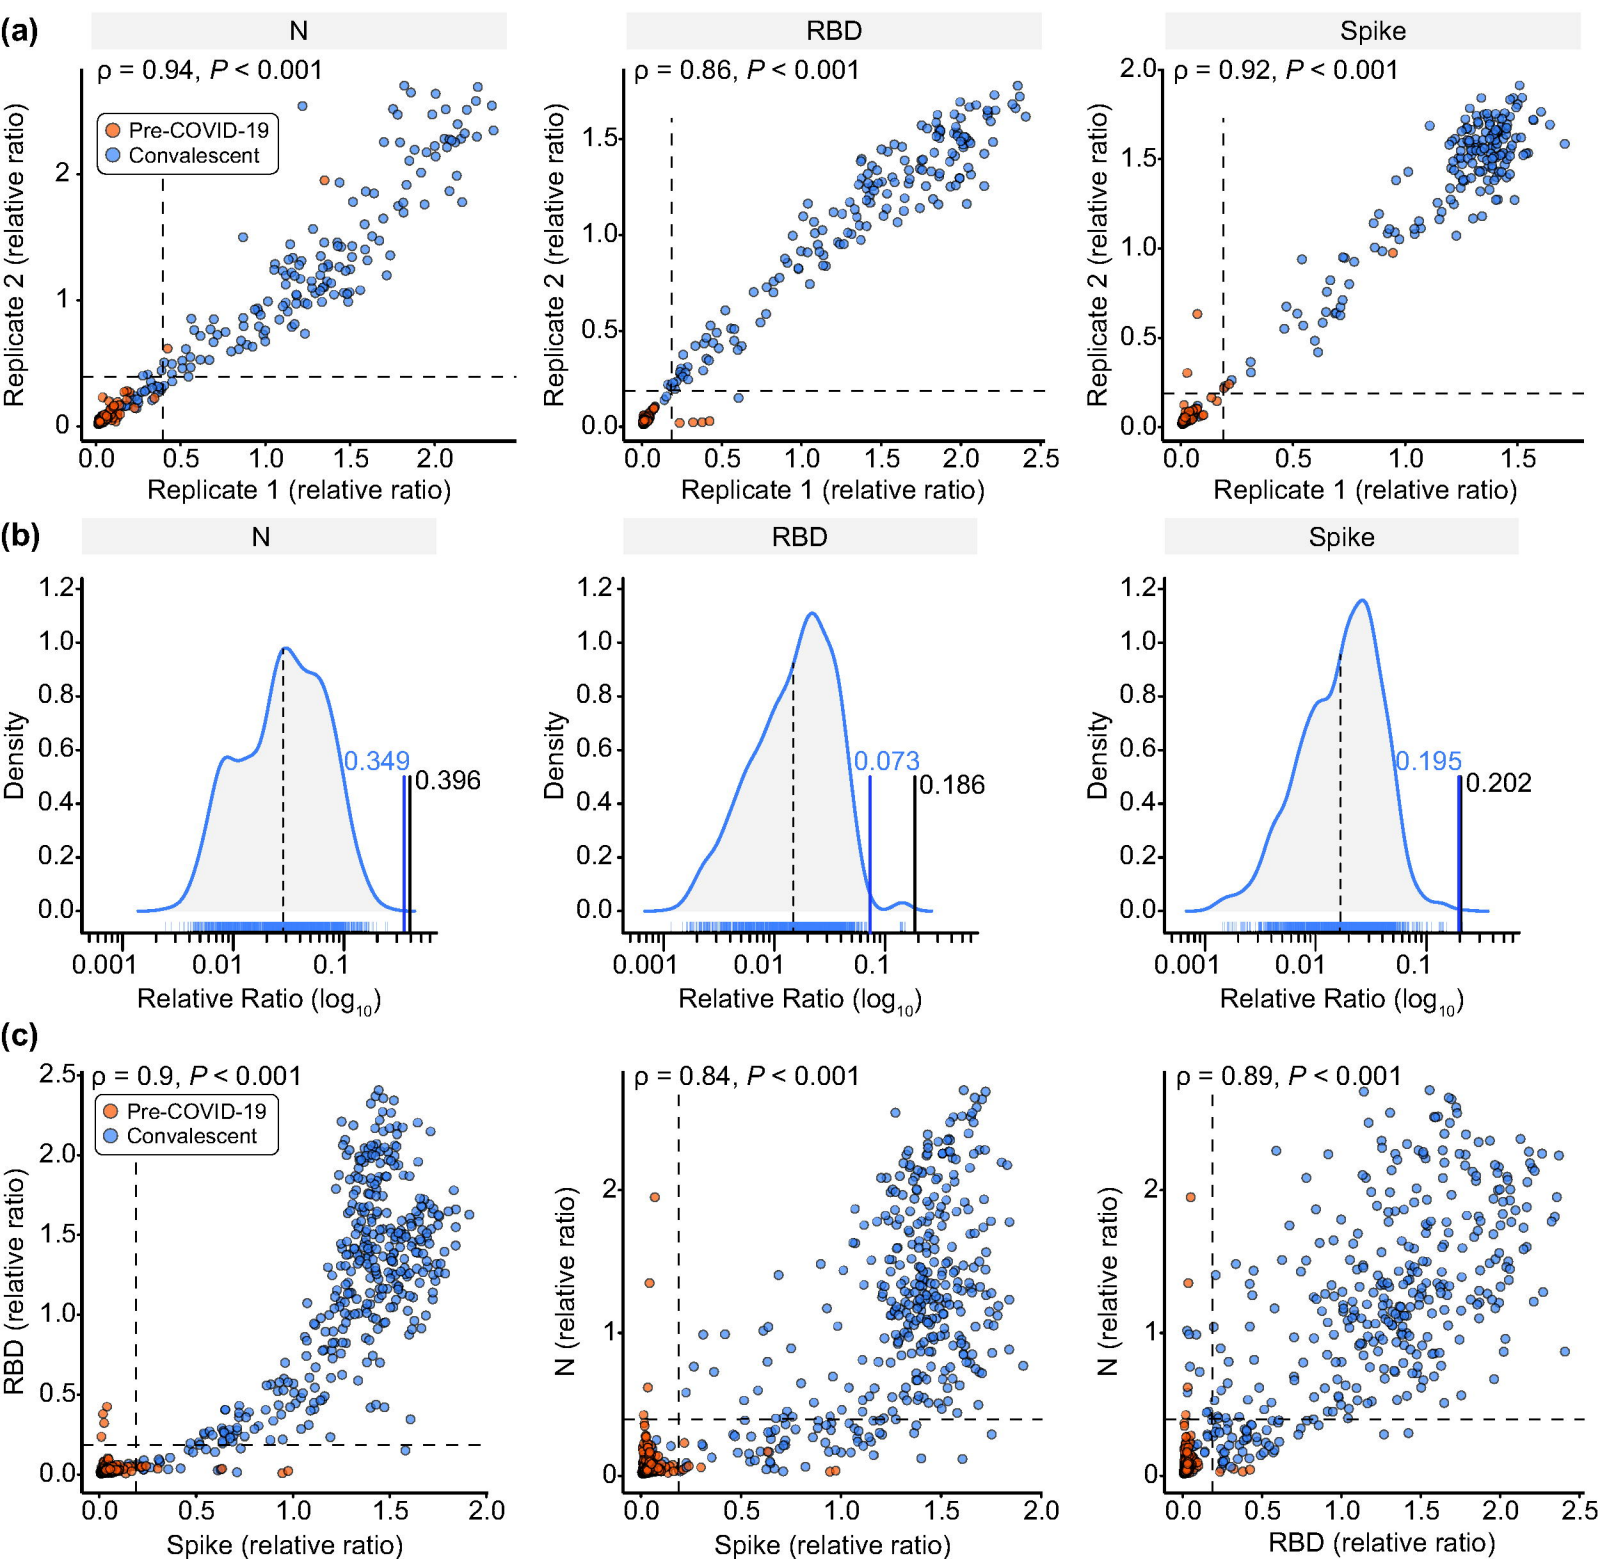



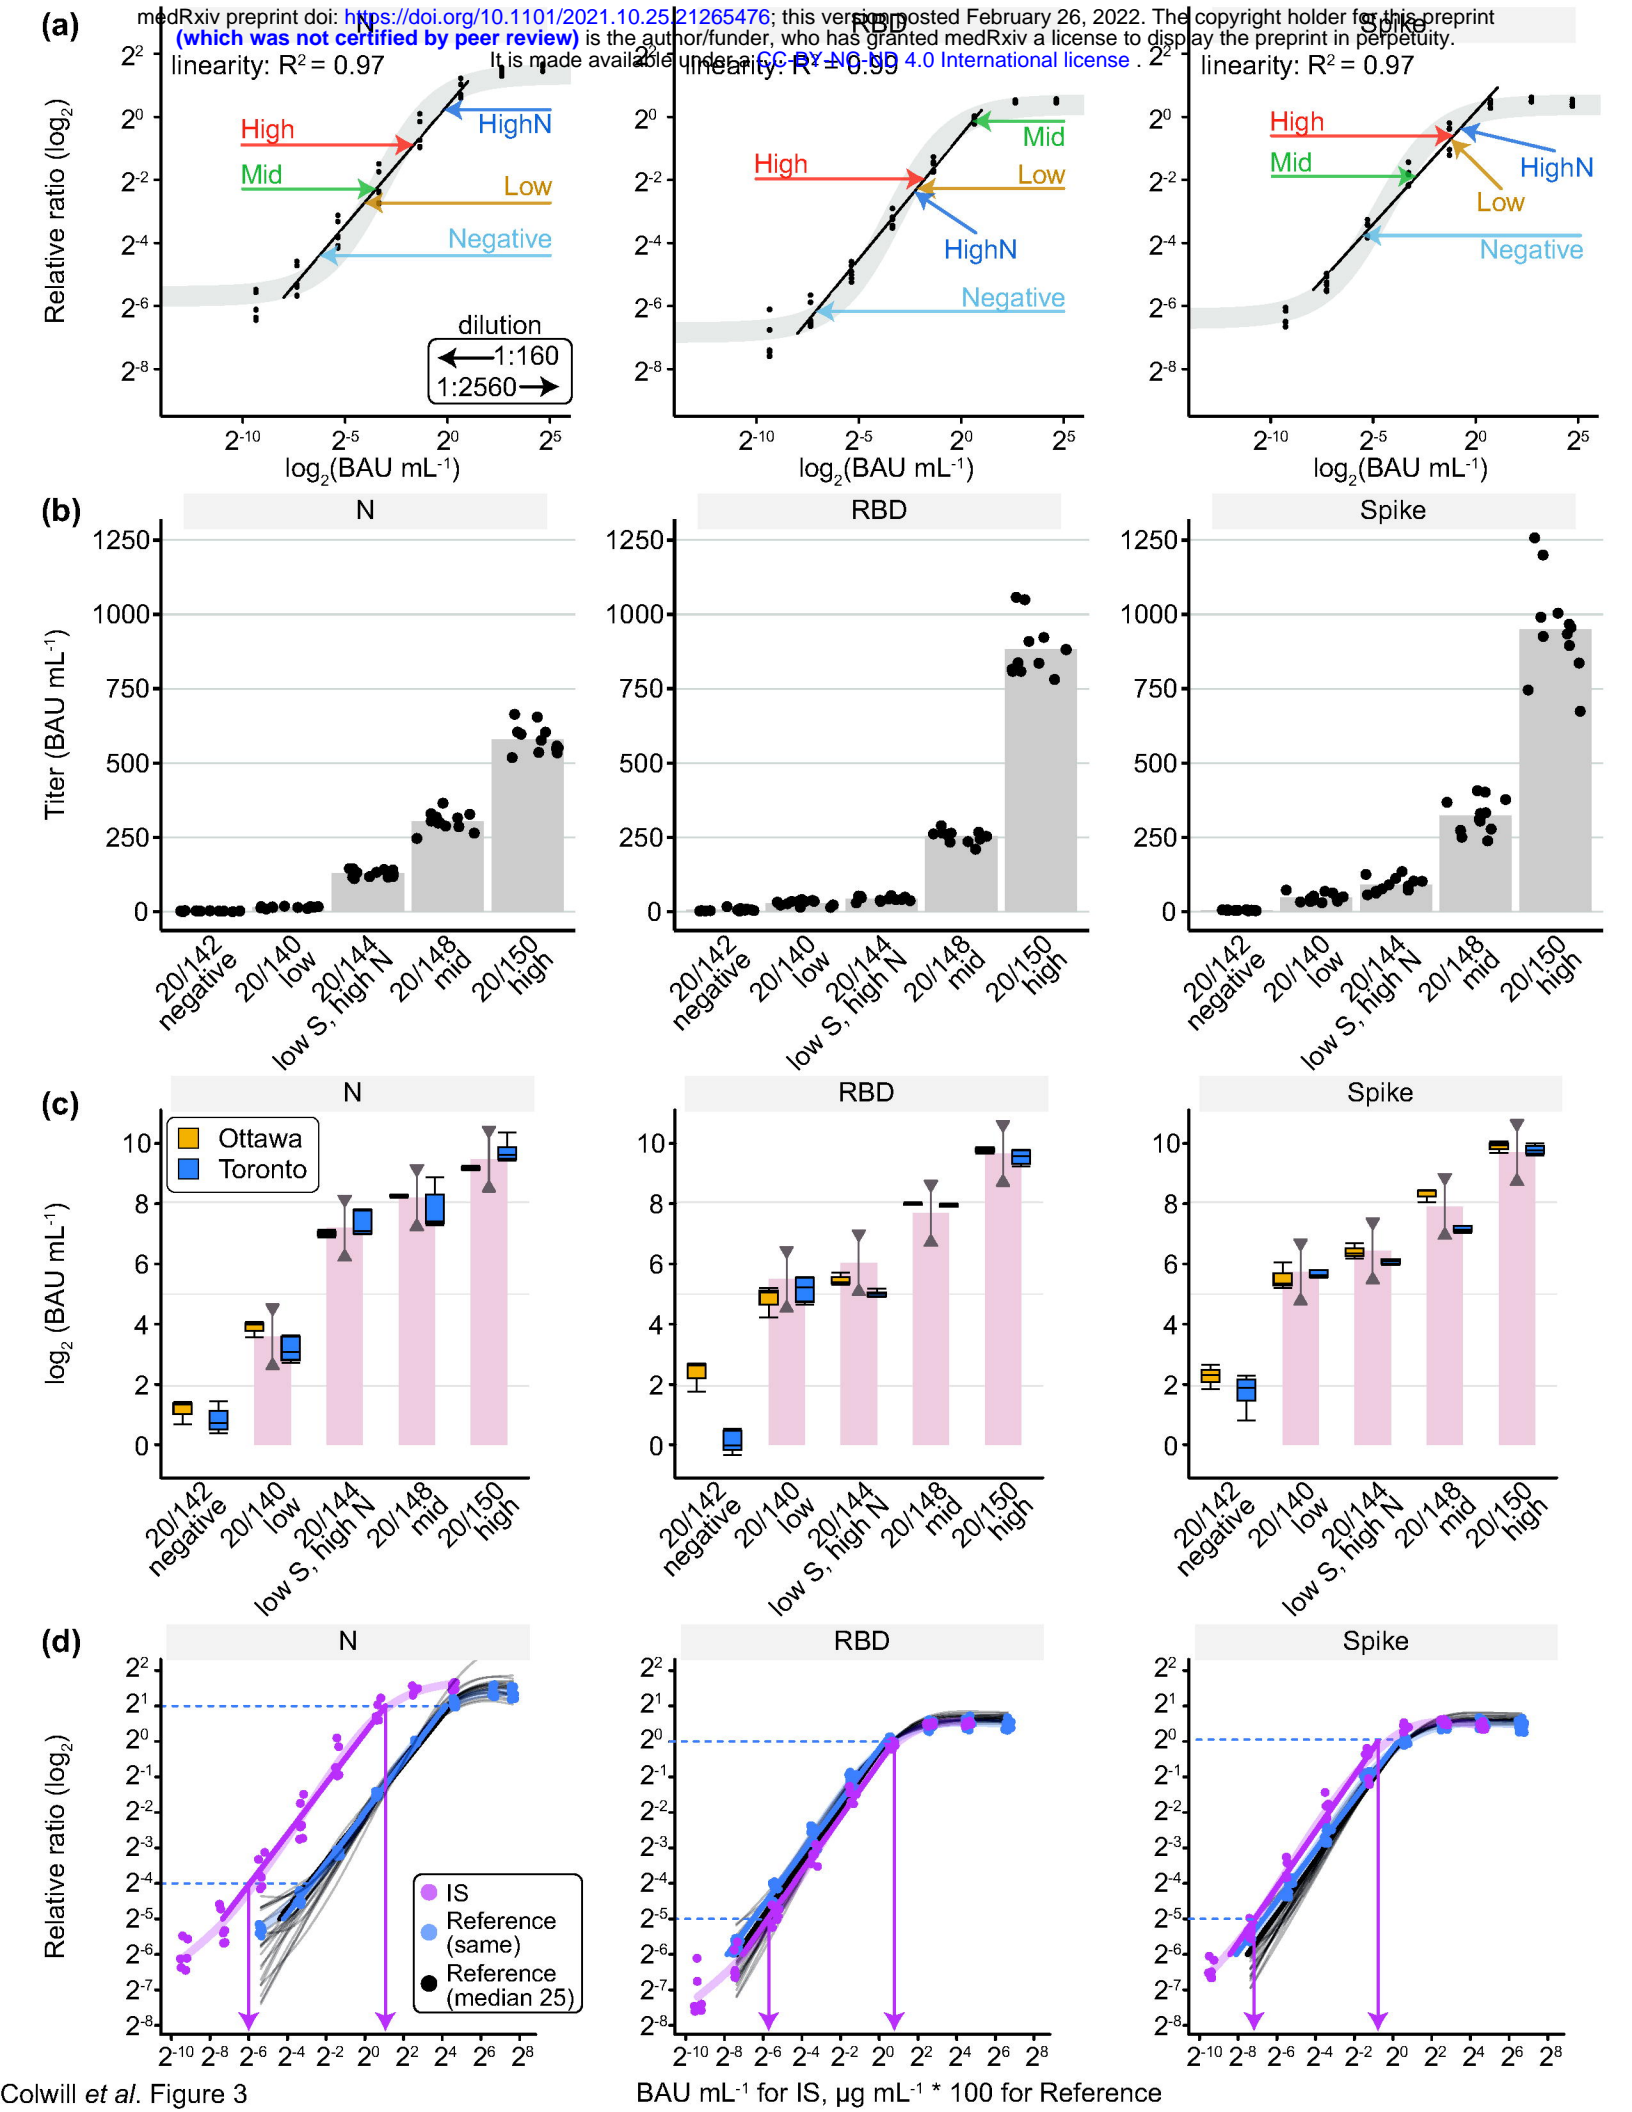

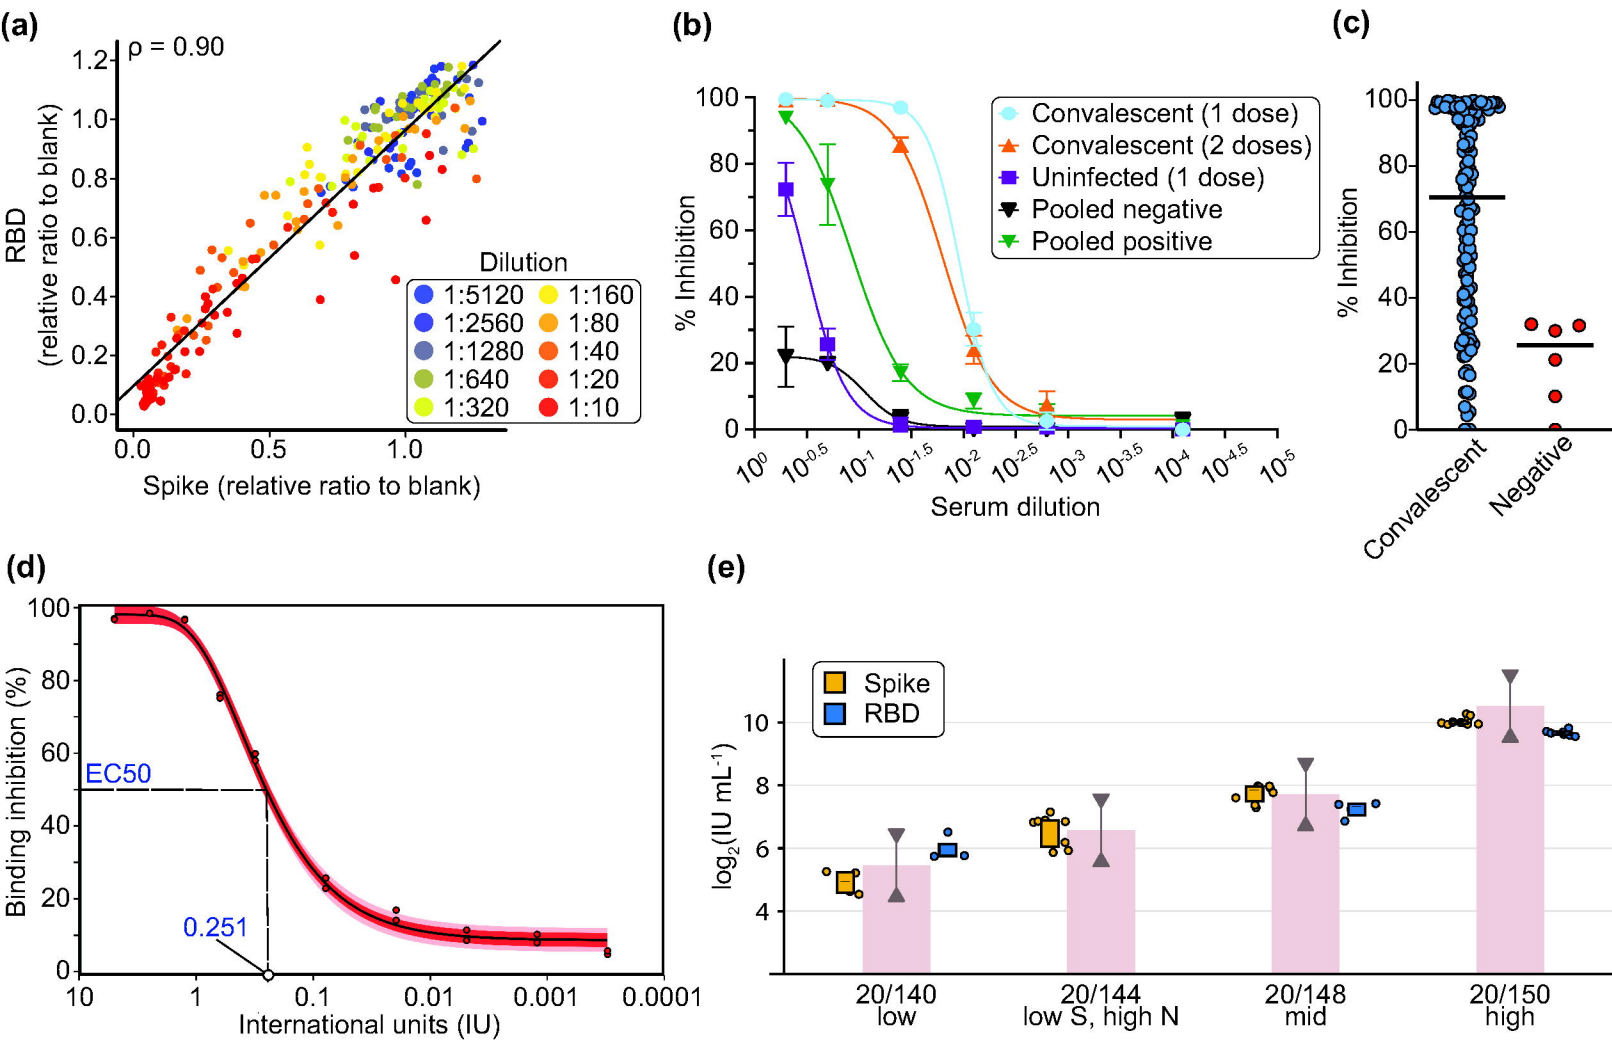

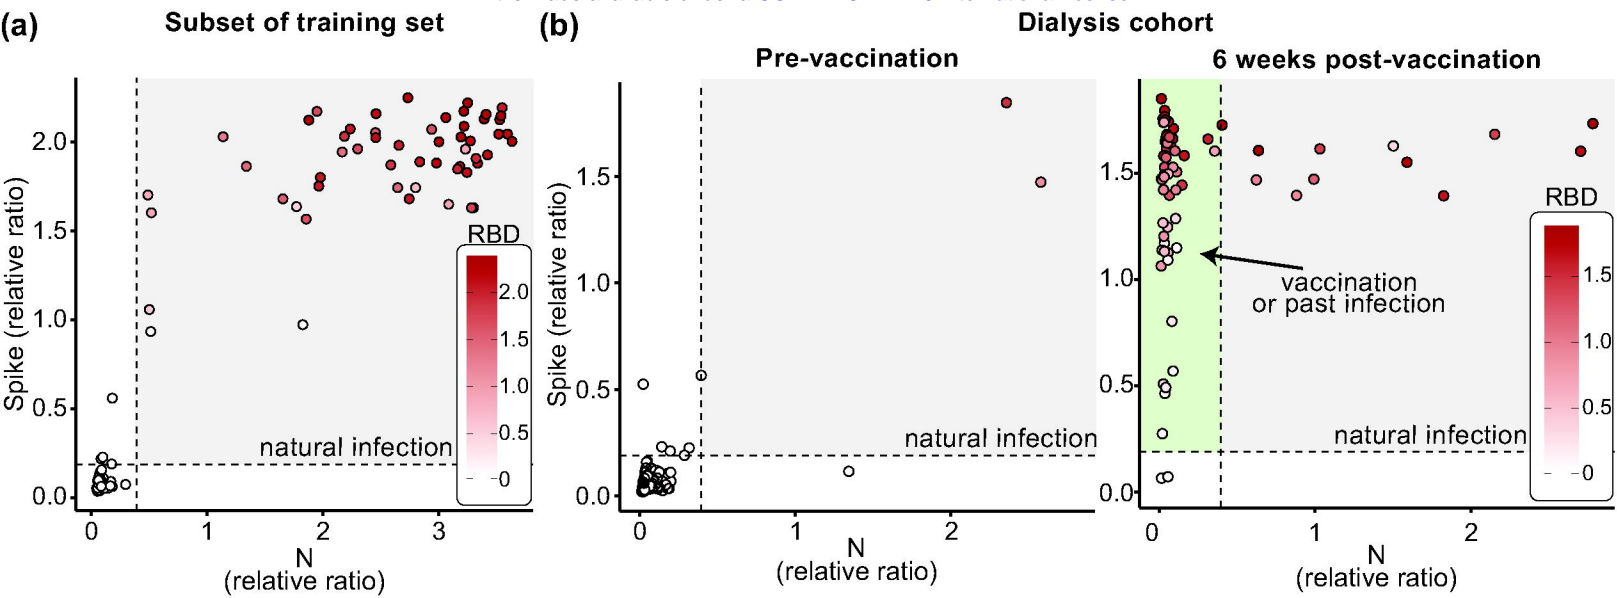

Source: http://medrxiv.org/content/10.1101/2021.10.25.21265476v2.full.pdf
